# Supplementary material for: The combination of the tubulin binding small molecule PTC596 and proteasome inhibitors suppresses the growth of myeloma cells
Source: PubMed Central journal article supplement (PMC7822878; doi:10.1038/s41598-021-81577-x), 2021-01-22

**The combination of the tubulin binding small molecule PTC596 and proteasome inhibitors suppresses the growth of myeloma cells**

Yurie Nagai, Naoya Mimura, Ola Rizq, Yusuke Isshiki, Motohiko Oshima, Mohamed Rizk, Atsunori Saraya, Shuhei Koide, Yaeko Nakajima-Takagi, Makiko Miyota, Tetsuhiro Chiba, Nagisa Oshima-Hasegawa, Tomoya Muto, Shokichi Tsukamoto, Shio Mitsukawa, Yusuke Takeda, Chikako Ohwada, Masahiro Takeuchi, Tohru Iseki, Chiaki Nakaseko, William Lennox, Josephine Sheedy, Marla Weetall, Koutaro Yokote, Atsushi Iwama, and Emiko Sakaida

**Supporting Information:**

**Supplementary Tables S1-S8**

**Supplementary Figures and legends S1-S6**

**Whole blots for cropped images**

# Supplementary Table S1.

CC<sub>50</sub> values of cell lines calculated from the results of MTS assays described in Figure 1A, B.

|              | MM.1S | H929  | U266  | RPMI<br>8226 | KMS-11 | KMS-11<br>/BTZ | OPM-2 | OPM-2<br>/BTZ |
|--------------|-------|-------|-------|--------------|--------|----------------|-------|---------------|
| CC50<br>[nM] | 45.58 | 44.03 | 24.19 | 50.75        | 49.46  | 48.33          | 97.74 | 74.21         |

## Supplementary Table S2.

The combination effect of two agents was analyzed by isobologram analysis with Compu-Syn software (ComboSyn, Inc).

(A) CI values of MM.1S cells treated with the combination of PTC596 and bortezomib in a BrdU proliferation assay (Figure 3A).

(B) CI values of MM.1S cells treated with the combination of PTC596 and bortezomib in an MTS assay (Figure S1).

(C) CI values of OPM-2 cells treated with the combination of PTC596 and bortezomib in a BrdU proliferation assay (Figure S2).

(D) CI values of MM.1S cells treated with the combination of PTC596 and carfilzomib in a BrdU proliferation assay (Figure S3).

Supplementary Table S2A

| PTC596 [nM] | Bortezomib [nM] | Fa     | CI      |
|-------------|-----------------|--------|---------|
| 60.0        | 2.0             | 0.4031 | 0.88409 |
| 60.0        | 2.5             | 0.5842 | 0.70830 |
| 60.0        | 3.0             | 0.6315 | 0.75578 |
| 90.0        | 2.0             | 0.4296 | 0.82729 |
| 90.0        | 2.5             | 0.5813 | 0.71339 |
| 90.0        | 3.0             | 0.6719 | 0.68030 |

Supplementary Table S2B

| PTC596 [nM] | Bortezomib [nM] | Fa     | CI      |
|-------------|-----------------|--------|---------|
| 20.0        | 4.0             | 0.1804 | 1.28328 |
| 20.0        | 5.0             | 0.5075 | 1.12710 |
| 40.0        | 4.0             | 0.2120 | 1.50260 |
| 40.0        | 5.0             | 0.6441 | 1.12023 |
| 60.0        | 4.0             | 0.4290 | 1.30784 |
| 60.0        | 5.0             | 0.5819 | 1.29851 |
| 80.0        | 4.0             | 0.5004 | 1.34579 |
| 80.0        | 5.0             | 0.6145 | 1.36450 |

Supplementary Table S2C

| PTC596 [nM] | Bortezomib [nM] | Fa     | CI      |
|-------------|-----------------|--------|---------|
| 60.0        | 4.0             | 0.6469 | 1.01406 |
| 60.0        | 5.0             | 0.8250 | 1.06931 |
| 125.0       | 4.0             | 0.8491 | 0.88074 |
| 125.0       | 5.0             | 0.8385 | 1.09679 |
| 250.0       | 4.0             | 0.7795 | 1.07512 |
| 250.0       | 5.0             | 0.8790 | 1.09907 |

Supplementary Table S2D

| PTC596 [nM] | Carfilzomib [nM] | Fa     | CI      |
|-------------|------------------|--------|---------|
| 15          | 3                | 0.4271 | 1.20322 |
| 15          | 4                | 0.7983 | 0.86478 |
| 15          | 5                | 0.9473 | 0.77541 |
| 30          | 3                | 0.8492 | 0.63050 |
| 30          | 4                | 0.9374 | 0.65286 |
| 30          | 5                | 0.9562 | 0.75073 |



# Supplementary Table S3.

Significantly upregulated gene sets in MM.1S cells treated with PTC596.

Gene set enrichment analysis using our RNA-seq data identified gene sets, which were significantly enriched in MM.1S cells treated with PTC596 versus control. (FDR w-value <0.01).

c2.all.v7.0

| NAME                            | SIZE | NES  | NOM p-val | FDR q-val |
|---------------------------------|------|------|-----------|-----------|
| MACAEVA_PBMC_RESPONSE_TO_IR     | 96   | 2.42 | 0.000     | 0.000     |
| KERLEY_RESPONSE_TO_CISPLATIN_UP | 43   | 2.33 | 0.000     | 0.001     |

# Supplementary Table S4.

Significantly downregulated gene sets in MM.1S cells treated with PTC596.

Gene set enrichment analysis using our RNA-seq data identified gene sets, which were significantly downregulated in MM.1S cells treated with PTC596 versus control. (FDR w-value <0.01).

Hallmark

| NAME                            | SIZE | NES   | NOM p-val | FDR q-val |
|---------------------------------|------|-------|-----------|-----------|
| HALLMARK_E2F_TARGETS            | 196  | -3.03 | 0.000     | 0.000     |
| HALLMARK_G2M_CHECKPOINT         | 189  | -2.42 | 0.000     | 0.000     |
| HALLMARK_MYC_TARGETS_V1         | 197  | -2.34 | 0.000     | 0.000     |
| HALLMARK_ESTROGEN_RESPONSE_LATE | 164  | -2.00 | 0.000     | 0.002     |
| HALLMARK_DNA_REPAIR             | 146  | -1.87 | 0.001     | 0.005     |

c2.all.v7.0

| NAME                                          | SIZE | NES   | NOM p-val | FDR q-val |
|-----------------------------------------------|------|-------|-----------|-----------|
| DUTERTRE ESTRADIOL_RESPONSE_24HR_UP           | 303  | -3.23 | 0.000     | 0.000     |
| KOBAYASHI_EGFR_SIGNALING_24HR_DN              | 244  | -3.08 | 0.000     | 0.000     |
| ROSTY_CERVICAL_CANCER_PROLIFERATION_CLUSTER   | 135  | -2.96 | 0.000     | 0.000     |
| FUJII_YBX1_TARGETS_DN                         | 187  | -2.95 | 0.000     | 0.000     |
| BURTON_ADIPOGENESIS_3                         | 96   | -2.93 | 0.000     | 0.000     |
| VERNELL_RETINOBLASTOMA_PATHWAY_UP             | 69   | -2.91 | 0.000     | 0.000     |
| PUJANA_XPRSS_INT_NETWORK                      | 161  | -2.89 | 0.000     | 0.000     |
| BLUM_RESPONSE_TO_SALIRASIB_DN                 | 320  | -2.89 | 0.000     | 0.000     |
| GRAHAM_NORMAL QUIESCENT_VS_NORMAL_DIVIDING_DN | 85   | -2.88 | 0.000     | 0.000     |
| RUIZ_TNC_TARGETS_DN                           | 140  | -2.87 | 0.000     | 0.000     |
| WHITEFORD_PEDIATRIC_CANCER_MARKERS            | 111  | -2.86 | 0.000     | 0.000     |
| ZHOU_CELL_CYCLE_GENES_IN_IR_RESPONSE_6HR      | 79   | -2.86 | 0.000     | 0.000     |
| PUJANA_BRCA2_PCC_NETWORK                      | 403  | -2.84 | 0.000     | 0.000     |
| SHEDDEN_LUNG_CANCER_POOR_SURVIVAL_A6          | 428  | -2.83 | 0.000     | 0.000     |
| MISSIAGLIA_REGULATED_BY_METHYLATION_DN        | 115  | -2.82 | 0.000     | 0.000     |
| WHITFIELD_CELL_CYCLE_G1_S                     | 125  | -2.81 | 0.000     | 0.000     |
| PUJANA_BRCA_CENTERED_NETWORK                  | 116  | -2.81 | 0.000     | 0.000     |
| REACTOME_DNA_REPLICATION                      | 123  | -2.79 | 0.000     | 0.000     |
| SOTIRIOU_BREAST_CANCER_GRADE_1_VS_3_UP        | 147  | -2.79 | 0.000     | 0.000     |
| SARRIO_EPITHELIAL_MESENCHYMAL_TRANSITION_UP   | 175  | -2.78 | 0.000     | 0.000     |
| CROONQUIST_IL6_DEPRIVATION_DN                 | 93   | -2.78 | 0.000     | 0.000     |
| ZHOU_CELL_CYCLE_GENES_IN_IR_RESPONSE_24HR     | 116  | -2.77 | 0.000     | 0.000     |
| LEE_EARLY_T_LYMPHOCYTE_UP                     | 99   | -2.77 | 0.000     | 0.000     |
| FISCHER_G1_S_CELL_CYCLE                       | 188  | -2.76 | 0.000     | 0.000     |
| WINNEPENINCKX_MELANOMA_METASTASIS_UP          | 156  | -2.76 | 0.000     | 0.000     |
| GRAHAM_CML_DIVIDING_VS_NORMAL QUIESCENT_UP    | 169  | -2.76 | 0.000     | 0.000     |

|                                                              |     |       |       |       |
|--------------------------------------------------------------|-----|-------|-------|-------|
| WANG_RESPONSE_TO_GSK3_INHIBITOR_SB216763_DN                  | 336 | -2.75 | 0.000 | 0.000 |
| KONG_E2F3_TARGETS                                            | 91  | -2.75 | 0.000 | 0.000 |
| CHICAS_RB1_TARGETS_SENESCENT                                 | 488 | -2.73 | 0.000 | 0.000 |
| CROONQUIST_NRAS_SIGNALING_DN                                 | 69  | -2.71 | 0.000 | 0.000 |
| SONG_TARGETS_OF_IE86_CMV_PROTEIN                             | 54  | -2.70 | 0.000 | 0.000 |
| KAUFFMANN_MELANOMA_RELAPSE_UP                                | 61  | -2.69 | 0.000 | 0.000 |
| BENPORATH_PROLIFERATION                                      | 140 | -2.69 | 0.000 | 0.000 |
| REACTOME_DNA_REPLICATION_PRE_INITIATION                      | 82  | -2.68 | 0.000 | 0.000 |
| REACTOME_DNA_STRAND_ELONGATION                               | 32  | -2.68 | 0.000 | 0.000 |
| MANALO_HYPOXIA_DN                                            | 283 | -2.68 | 0.000 | 0.000 |
| REACTOME_MITOTIC_G1_G1_S_PHASES                              | 145 | -2.67 | 0.000 | 0.000 |
| FLORIO_NEOCORTEX_BASAL_RADIAL_GLIA_DN                        | 166 | -2.66 | 0.000 | 0.000 |
| REACTOME_S_PHASE                                             | 156 | -2.66 | 0.000 | 0.000 |
| REACTOME_ACTIVATION_OF_ATR_IN_RESPONSE_TO_REPLICATION_STRESS | 37  | -2.66 | 0.000 | 0.000 |
| MARKEY_RB1_ACUTE_LOF_UP                                      | 214 | -2.65 | 0.000 | 0.000 |
| CHICAS_RB1_TARGETS_GROWING                                   | 214 | -2.65 | 0.000 | 0.000 |
| CHIANG_LIVER_CANCER_SUBCLASS_PROLIFERATION_UP                | 163 | -2.64 | 0.000 | 0.000 |
| STEIN_ESRRA_TARGETS_RESPONSIVE_TO_ESTROGEN_DN                | 39  | -2.63 | 0.000 | 0.000 |
| BILD_E2F3_ONCOGENIC_SIGNATURE                                | 223 | -2.63 | 0.000 | 0.000 |
| KEGG_DNA_REPLICATION                                         | 36  | -2.62 | 0.000 | 0.000 |
| BERENJENO_TRANSFORMED_BY_RHOA_UP                             | 497 | -2.62 | 0.000 | 0.000 |
| KAUFFMANN_DNA_REPLICATION_GENES                              | 139 | -2.62 | 0.000 | 0.000 |
| HOFFMANN_LARGE_TO_SMALL_PRE_BII_LYMPHOCYTE_UP                | 142 | -2.61 | 0.000 | 0.000 |
| LINDGREN_BLADDER_CANCER_CLUSTER_3_UP                         | 306 | -2.61 | 0.000 | 0.000 |
| REACTOME_HDR_THROUGH_HOMOLOGOUS_RECOMBINATION_HRR            | 64  | -2.61 | 0.000 | 0.000 |
| MORI_LARGE_PRE_BII_LYMPHOCYTE_UP                             | 81  | -2.60 | 0.000 | 0.000 |
| LE_EGR2_TARGETS_UP                                           | 101 | -2.60 | 0.000 | 0.000 |
| TOYOTA_TARGETS_OF_MIR34B_AND_MIR34C                          | 417 | -2.60 | 0.000 | 0.000 |
| REACTOME_ACTIVATION_OF_THE_PRE_REPLICATIVE_COMPLEX           | 33  | -2.59 | 0.000 | 0.000 |
| ISHIDA_E2F_TARGETS                                           | 50  | -2.59 | 0.000 | 0.000 |
| MORI_IMMATURE_B_LYMPHOCYTE_DN                                | 86  | -2.59 | 0.000 | 0.000 |
| KANG_DOXORUBICIN_RESISTANCE_UP                               | 52  | -2.59 | 0.000 | 0.000 |
| VECCHI_GASTRIC_CANCER_EARLY_UP                               | 388 | -2.59 | 0.000 | 0.000 |
| WONG_EMBRYONIC_STEM_CELL_CORE                                | 325 | -2.58 | 0.000 | 0.000 |
| DUTERTRE ESTRADIOL_RESPONSE_6HR_UP                           | 214 | -2.58 | 0.000 | 0.000 |
| PYEON_HPV_POSITIVE_TUMORS_UP                                 | 86  | -2.58 | 0.000 | 0.000 |
| REACTOME_HOMOLOGOUS_DNA_PAIRING_AND_STRAND_EXCHANGE          | 41  | -2.57 | 0.000 | 0.000 |
| PYEON_CANCER_HEAD_AND_NECK_VS_CERVICAL_UP                    | 177 | -2.56 | 0.000 | 0.000 |
| LI_WILMS_TUMOR_VS_FETAL_KIDNEY_1_DN                          | 155 | -2.56 | 0.000 | 0.000 |
| MITSIADES_RESPONSE_TO_APLIDIN_DN                             | 241 | -2.55 | 0.000 | 0.000 |
| MOLENAAR_TARGETS_OF_CCND1_AND_CDK4_DN                        | 52  | -2.55 | 0.000 | 0.000 |
| REACTOME_EXTENSION_OF_TELOMERES                              | 30  | -2.55 | 0.000 | 0.000 |

|                                                                               |     |       |       |       |
|-------------------------------------------------------------------------------|-----|-------|-------|-------|
| MUELLER_PLURINET                                                              | 286 | -2.54 | 0.000 | 0.000 |
| WHITFIELD_CELL_CYCLE_S                                                        | 143 | -2.52 | 0.000 | 0.000 |
| PUJANA_BREAST_CANCER_WITH_BRCA1_MUTATED_UP                                    | 54  | -2.52 | 0.000 | 0.000 |
| SENGUPTA_NASOPHARYNGEAL_CARCIOMA_UP                                           | 276 | -2.52 | 0.000 | 0.000 |
| GARCIA_TARGETS_OF_FLI1_AND_DAX1_DN                                            | 150 | -2.52 | 0.000 | 0.000 |
| REN_BOUND_BY_E2F                                                              | 60  | -2.51 | 0.000 | 0.000 |
| FOURNIER_ACINAR_DEVELOPMENT_LATE_2                                            | 273 | -2.51 | 0.000 | 0.000 |
| STEIN_ESR1_TARGETS                                                            | 73  | -2.51 | 0.000 | 0.000 |
| PID_FANCONI_PATHWAY                                                           | 45  | -2.50 | 0.000 | 0.000 |
| BURTON_ADIPOGENESIS_PEAK_AT_16HR                                              | 38  | -2.50 | 0.000 | 0.000 |
| REACTOME_MITOTIC_PROMETAPHASE                                                 | 191 | -2.50 | 0.000 | 0.000 |
| FRASOR_RESPONSE_TO_SERM_OR_FULVESTRANT_DN                                     | 45  | -2.50 | 0.000 | 0.000 |
| AFFAR_YY1_TARGETS_DN                                                          | 197 | -2.50 | 0.000 | 0.000 |
| REACTOME_HDR_THROUGH_SINGLE_STRAND_ANNEALING_SSA                              | 36  | -2.50 | 0.000 | 0.000 |
| ZHENG_GLIOMASTOMA_PLASTICITY_UP                                               | 209 | -2.49 | 0.000 | 0.000 |
| KAUFFMANN_DNA_REPAIR_GENES                                                    | 225 | -2.45 | 0.000 | 0.000 |
| PID_ATR_PATHWAY                                                               | 39  | -2.45 | 0.000 | 0.000 |
| KAMMINGA_EZH2_TARGETS                                                         | 41  | -2.44 | 0.000 | 0.000 |
| ZHAN_MULTIPLE_MYELOMA_PR_UP                                                   | 43  | -2.43 | 0.000 | 0.000 |
| REACTOME_G1_S_SPECIFIC_TRANSCRIPTION                                          | 28  | -2.43 | 0.000 | 0.000 |
| REACTOME_TELOMERE_C_STRAND_LAGGING_STRAND_SYNTHESIS                           | 24  | -2.42 | 0.000 | 0.000 |
| MARKEY_RB1_CHRONIC_LOF_UP                                                     | 98  | -2.41 | 0.000 | 0.000 |
| BASAKI_YBX1_TARGETS_UP                                                        | 268 | -2.41 | 0.000 | 0.000 |
| BENPORATH_ES_1                                                                | 341 | -2.41 | 0.000 | 0.000 |
| MORI_PRE_BI_LYMPHOCYTE_UP                                                     | 74  | -2.41 | 0.000 | 0.000 |
| VANTVEER_BREAST_CANCER_METASTASIS_DN                                          | 119 | -2.41 | 0.000 | 0.000 |
| RHEIN_ALL_GLUCOCORTICOID_THERAPY_DN                                           | 350 | -2.40 | 0.000 | 0.000 |
| EGUCHI_CELL_CYCLE_RB1_TARGETS                                                 | 23  | -2.39 | 0.000 | 0.000 |
| ODONNELL_TARGETS_OF_MYC_AND_TFRC_DN                                           | 43  | -2.39 | 0.000 | 0.000 |
| RHODES_UNDIFFERENTIATED_CANCER                                                | 66  | -2.39 | 0.000 | 0.000 |
| REACTOME_CELL_CYCLE_CHECKPOINTS                                               | 267 | -2.38 | 0.000 | 0.000 |
| REACTOME_RECOGNITION_OF_DNA_DAMAGE_BY_PCNA_CONTAINING_REPLICATI<br>ON_COMPLEX | 30  | -2.38 | 0.000 | 0.000 |
| FURUKAWA_DUSP6_TARGETS_PCI35_DN                                               | 63  | -2.37 | 0.000 | 0.000 |
| FERRANDO_T_ALL_WITH_MLL_ENL_FUSION_DN                                         | 77  | -2.37 | 0.000 | 0.000 |
| REACTOME_DNA_DAMAGE_BYPASS                                                    | 45  | -2.36 | 0.000 | 0.000 |
| REACTOME_RESOLUTION_OF_ABASIC_SITES_AP_SITES                                  | 38  | -2.36 | 0.000 | 0.000 |
| MORI_EMU_MYC_LYMPHOMA_BY_ONSET_TIME_UP                                        | 102 | -2.36 | 0.000 | 0.000 |
| ODONNELL_TFRC_TARGETS_DN                                                      | 120 | -2.35 | 0.000 | 0.000 |
| VILLANUEVA_LIVER_CANCER_KRT19_UP                                              | 164 | -2.35 | 0.000 | 0.000 |
| REACTOME_RESOLUTION_OF_SISTER_CHROMATID_COHESION                              | 118 | -2.35 | 0.000 | 0.000 |
| PID_E2F_PATHWAY                                                               | 68  | -2.35 | 0.000 | 0.000 |

|                                                                                           |     |       |       |       |
|-------------------------------------------------------------------------------------------|-----|-------|-------|-------|
| RIZ_ERYTHROID_DIFFERENTIATION                                                             | 78  | -2.35 | 0.000 | 0.000 |
| WHITFIELD_CELL_CYCLE_LITERATURE                                                           | 41  | -2.34 | 0.000 | 0.000 |
| HORIUCHI_WTAP_TARGETS_DN                                                                  | 294 | -2.34 | 0.000 | 0.000 |
| REACTOME_ASSEMBLY_OF_THE_PRE_REPLICATIVE_COMPLEX                                          | 65  | -2.34 | 0.000 | 0.000 |
| REACTOME_GAP_FILLING_DNA_REPAIR_SYNTHESIS_AND_LIGATION_IN_GG_NER                          | 25  | -2.34 | 0.000 | 0.000 |
| FERREIRA_EWINGS_SARCOMA_UNSTABLE_VS_STABLE_UP                                             | 148 | -2.34 | 0.000 | 0.000 |
| GOLDRATH_ANTIGEN_RESPONSE                                                                 | 316 | -2.32 | 0.000 | 0.000 |
| REACTOME_RESOLUTION_OF_AP_SITES_VIA_THE_MULTIPLE_NUCLEOTIDE_PATCH<br>_REPLACEMENT_PATHWAY | 25  | -2.32 | 0.000 | 0.000 |
| PUJANA_BREAST_CANCER_LIT_INT_NETWORK                                                      | 98  | -2.31 | 0.000 | 0.000 |
| REACTOME_PCNA_DEPENDENT_LONG_PATCH_BASE_EXCISION_REPAIR                                   | 21  | -2.31 | 0.000 | 0.000 |
| SUNG_METASTASIS_STROMA_DN                                                                 | 47  | -2.30 | 0.000 | 0.000 |
| REACTOME_LAGGING_STRAND_SYNTHESIS                                                         | 20  | -2.30 | 0.000 | 0.000 |

# Supplementary Table S5.

Significantly upregulated gene sets in MM.1S cells treated with combination treatment of PTC596 with bortezomib.

Gene set enrichment analysis using our RNA-seq data identified gene sets, which were significantly enriched in MM.1S cells treated with the combination treatment versus control. (FDR w-value <0.01).

## Hallmark

| NAME                                     | SIZE | NES  | NOM p-val | FDR q-val |
|------------------------------------------|------|------|-----------|-----------|
| HALLMARK_TNFA_SIGNALING_VIA_NFKB         | 183  | 2.31 | 0.000     | 0.000     |
| HALLMARK_APOPTOSIS                       | 152  | 2.12 | 0.000     | 0.000     |
| HALLMARK_P53_PATHWAY                     | 187  | 1.98 | 0.000     | 0.000     |
| HALLMARK_HYPOXIA                         | 182  | 1.88 | 0.000     | 0.000     |
| HALLMARK_UV_RESPONSE_UP                  | 148  | 1.71 | 0.000     | 0.006     |
| HALLMARK_IL6_JAK_STAT3_SIGNALING         | 68   | 1.64 | 0.000     | 0.008     |
| HALLMARK_REACTIVE_OXYGEN_SPECIES_PATHWAY | 46   | 1.63 | 0.002     | 0.007     |
| HALLMARK_UNFOLDED_PROTEIN_RESPONSE       | 109  | 1.60 | 0.000     | 0.008     |
| HALLMARK_HEME_METABOLISM                 | 176  | 1.60 | 0.000     | 0.007     |

## c2.all.v7.0

| NAME                                                               | SIZE | NES  | NOM p-val | FDR q-val |
|--------------------------------------------------------------------|------|------|-----------|-----------|
| PODAR_RESPONSE_TO_ADAPHOSTIN_UP                                    | 144  | 3.01 | 0.000     | 0.000     |
| CONCANNON_APOPTOSIS_BY_EPOXOMICIN_UP                               | 224  | 2.93 | 0.000     | 0.000     |
| GARGALOVIC_RESPONSE_TO_OXIDIZED_PHOSPHOLIPIDS_BLUE_UP              | 128  | 2.70 | 0.000     | 0.000     |
| REACTOME_HSP90_CHAPERONE_CYCLE_FOR_STEROID_HORMONE_RECEPTORS_SHR   | 54   | 2.52 | 0.000     | 0.000     |
| REACTOME_THE_ROLE_OF_GTSE1_IN_G2_M_PROGRESSION_AFTER_G2_CHECKPOINT | 74   | 2.51 | 0.000     | 0.000     |
| REACTOME_AUF1_HNRNP_D0_BINDS_AND_DESTABILIZES_MRNA                 | 52   | 2.49 | 0.000     | 0.000     |
| REACTOME_DECTIN_1_MEDIATED_NONCANONICAL_NF_KB_SIGNALING            | 58   | 2.45 | 0.000     | 0.000     |
| REACTOME_STABILIZATION_OF_P53                                      | 53   | 2.44 | 0.000     | 0.000     |
| REACTOME_HSF1_DEPENDENT_TRANSACTIVATION                            | 35   | 2.42 | 0.000     | 0.000     |
| REACTOME_HEDGEHOG_LIGAND_BIOGENESIS                                | 59   | 2.41 | 0.000     | 0.000     |
| PICCALUGA_ANGIOIMMUNOBLASTIC_LYMPHOMA_DN                           | 130  | 2.40 | 0.000     | 0.000     |
| REACTOME_VIF_MEDIATED_DEGRADATION_OF_APOBEC3G                      | 49   | 2.40 | 0.000     | 0.000     |
| REACTOME_DEGRADATION_OF_AXIN                                       | 52   | 2.40 | 0.000     | 0.000     |
| REACTOME_ABC_TRANSPORTER_DISORDERS                                 | 71   | 2.40 | 0.000     | 0.000     |
| REACTOME_FCERI_MEDIATED_NF_KB_ACTIVATION                           | 78   | 2.39 | 0.000     | 0.000     |
| REACTOME_NEGATIVE_REGULATION_OF_NOTCH4_SIGNALING                   | 53   | 2.38 | 0.000     | 0.000     |
| KEGG_PROTEASOME                                                    | 41   | 2.37 | 0.000     | 0.000     |
| REACTOME_DEGRADATION_OF_GLI1_BY_THE_PROTEASOME                     | 57   | 2.36 | 0.000     | 0.000     |
| REACTOME_ACTIVATION_OF_NF_KAPPAB_IN_B_CELLS                        | 64   | 2.36 | 0.000     | 0.000     |
| REACTOME_CROSS_PRESENTATION_OF_SOLUBLE_EXOGENOUS_ANTIGENS_ENDOSOM  | 43   | 2.36 | 0.000     | 0.000     |
| ES                                                                 |      |      |           |           |

|                                                                                   |     |      |       |       |
|-----------------------------------------------------------------------------------|-----|------|-------|-------|
| REACTOME_MAPK6_MAPK4_SIGNALING                                                    | 83  | 2.35 | 0.000 | 0.000 |
| REACTOME_FBXL7_DOWN_REGULATES_AURKA_DURING_MITOTIC_ENTRY_AND_IN_EAR<br>LY_MITOSIS | 52  | 2.35 | 0.000 | 0.000 |
| REACTOME_REGULATION_OF_PTEN_STABILITY_AND_ACTIVITY                                | 65  | 2.35 | 0.000 | 0.000 |
| REACTOME_REGULATION_OF_APOPTOSIS                                                  | 50  | 2.35 | 0.000 | 0.000 |
| REACTOME_CELLULAR_RESPONSE_TO_HYPOXIA                                             | 68  | 2.35 | 0.000 | 0.000 |
| REACTOME_ATTENUATION_PHASE                                                        | 26  | 2.35 | 0.000 | 0.000 |
| GARGALOVIC_RESPONSE_TO_OXIDIZED_PHOSPHOLIPIDS_TURQUOISE_UP                        | 76  | 2.34 | 0.000 | 0.000 |
| REACTOME_INTERLEUKIN_1_SIGNALING                                                  | 95  | 2.34 | 0.000 | 0.000 |
| REACTOME_DEGRADATION_OF_DVL                                                       | 54  | 2.33 | 0.000 | 0.000 |
| REACTOME_ABC_FAMILY_PROTEINS_MEDIATED_TRANSPORT                                   | 95  | 2.33 | 0.000 | 0.000 |
| REACTOME_DEFECTIVE_CFTR_CAUSES_CYSTIC_FIBROSIS                                    | 57  | 2.33 | 0.000 | 0.000 |
| REACTOME_CLEC7A_DECTIN_1_SIGNALING                                                | 95  | 2.33 | 0.000 | 0.000 |
| REACTOME_REGULATION_OF_MRNA_STABILITY_BY_<br>PROTEINS_THAT_BIND_AU_RICH_ELEMENTS  | 84  | 2.32 | 0.000 | 0.000 |
| REACTOME_REGULATION_OF_RUNX3_EXPRESSION_AND_ACTIVITY                              | 54  | 2.31 | 0.000 | 0.000 |
| NOJIMA_SFRP2_TARGETS_UP                                                           | 30  | 2.30 | 0.000 | 0.000 |
| REACTOME_ANTIGEN_PROCESSING_CROSS_PRESENTATION                                    | 92  | 2.29 | 0.000 | 0.000 |
| REACTOME_METABOLISM_OF_POLYAMINES                                                 | 56  | 2.29 | 0.000 | 0.000 |
| REACTOME_HSF1_ACTIVATION                                                          | 29  | 2.28 | 0.000 | 0.000 |
| REACTOME_TNFR2_NON_CANONICAL_NF_KB_PATHWAY                                        | 89  | 2.27 | 0.000 | 0.000 |
| REACTOME_REGULATION_OF_RUNX2_EXPRESSION_AND_ACTIVITY                              | 68  | 2.26 | 0.000 | 0.000 |
| GERY_CEBP_TARGETS                                                                 | 104 | 2.25 | 0.000 | 0.000 |
| BLUM_RESPONSE_TO_SALIRASIB_UP                                                     | 235 | 2.24 | 0.000 | 0.000 |
| REACTOME_DEGRADATION_OF_BETA_CATENIN_BY_THE_DESTRUCTION_COMPLEX                   | 79  | 2.24 | 0.000 | 0.000 |
| REACTOME_DOWNSTREAM_SIGNALING_EVENTS_OF_B_CELL_RECEPTOR_BCR                       | 78  | 2.22 | 0.000 | 0.000 |
| GARGALOVIC_RESPONSE_TO_OXIDIZED_PHOSPHOLIPIDS_MAGENTA_UP                          | 27  | 2.22 | 0.000 | 0.000 |
| REACTOME_G1_S_DNA_DAMAGE_CHECKPOINTS                                              | 63  | 2.21 | 0.000 | 0.000 |
| REACTOME_HEDGEHOG_OFF_STATE                                                       | 105 | 2.21 | 0.000 | 0.000 |
| REACTOME_COPI_INDEPENDENT_GOLGI_TO_ER_RETROGRADE_TRAFFIC                          | 50  | 2.21 | 0.000 | 0.000 |
| KRIGE_AMINO_ACID_DEPRIVATION                                                      | 27  | 2.21 | 0.000 | 0.000 |
| HELLER_SILENCED_BY_METHYLATION_DN                                                 | 102 | 2.20 | 0.000 | 0.000 |
| REACTOME_REGULATION_OF_EXPRESSION_OF_SLITS_AND_ROBOS                              | 158 | 2.20 | 0.000 | 0.000 |
| LEONARD_HYPOXIA                                                                   | 42  | 2.20 | 0.000 | 0.000 |
| TIEN_INTESTINE_PROBIOTICS_24HR_DN                                                 | 201 | 2.19 | 0.000 | 0.000 |
| REACTOME_SIGNALING_BY_NOTCH4                                                      | 81  | 2.19 | 0.000 | 0.000 |
| REACTOME_HEDGEHOG_ON_STATE                                                        | 80  | 2.18 | 0.000 | 0.000 |
| GALINDO_IMMUNE_RESPONSE_TO_ENTEROTOXIN                                            | 71  | 2.18 | 0.000 | 0.000 |
| REACTOME_CELLULAR_RESPONSE_TO_HEAT_STRESS                                         | 96  | 2.18 | 0.000 | 0.000 |
| BURTON_ADIPOGENESIS_PEAK_AT_2HR                                                   | 39  | 2.17 | 0.000 | 0.000 |
| REACTOME_C_TYPE_LECTIN_RECEPTORS_CLRS                                             | 124 | 2.16 | 0.000 | 0.000 |
| KAN_RESPONSE_TO_ARSENIC_TRIOXIDE                                                  | 99  | 2.16 | 0.000 | 0.000 |

|                                                                                           |     |      |       |       |
|-------------------------------------------------------------------------------------------|-----|------|-------|-------|
| REACTOME_UCH_PROTEINASES                                                                  | 96  | 2.15 | 0.000 | 0.000 |
| CHEN_LVAD_SUPPORT_OF_FAILING_HEART_UP                                                     | 82  | 2.15 | 0.000 | 0.000 |
| REACTOME_DOWNSTREAM_TCR_SIGNALING                                                         | 88  | 2.15 | 0.000 | 0.000 |
| MITSIADES_RESPONSE_TO_APLIDIN_UP                                                          | 423 | 2.15 | 0.000 | 0.000 |
| NAGASHIMA_NRG1_SIGNALING_UP                                                               | 157 | 2.14 | 0.000 | 0.000 |
| REACTOME_SIGNALING_BY_HEDGEHOG                                                            | 138 | 2.14 | 0.000 | 0.000 |
| CHEN_HOXA5_TARGETS_9HR_UP                                                                 | 210 | 2.13 | 0.000 | 0.000 |
| REACTOME_TRANSCRIPTIONAL_REGULATION_BY_RUNX3                                              | 93  | 2.13 | 0.000 | 0.000 |
| REACTOME_ASYMMETRIC_LOCALIZATION_OF_PCP_PROTEINS                                          | 61  | 2.13 | 0.000 | 0.000 |
| GROSS_HYPOXIA_VIA_ELK3_DN                                                                 | 133 | 2.13 | 0.000 | 0.000 |
| CHO_NR4A1_TARGETS                                                                         | 24  | 2.13 | 0.000 | 0.000 |
| CHUANG_OXIDATIVE_STRESS_RESPONSE_UP                                                       | 26  | 2.12 | 0.000 | 0.000 |
| REACTOME_EUKARYOTIC_TRANSLATION_INITIATION                                                | 114 | 2.12 | 0.000 | 0.000 |
| DANG_MYC_TARGETS_DN                                                                       | 29  | 2.12 | 0.000 | 0.000 |
| REACTOME_SCF_SKP2_MEDIATED_DEGRADATION_OF_P27_21                                          | 58  | 2.11 | 0.000 | 0.000 |
| HOUSTIS_ROS                                                                               | 31  | 2.11 | 0.000 | 0.000 |
| REACTOME_REGULATION_OF_RAS_BY_GAPS                                                        | 65  | 2.11 | 0.000 | 0.000 |
| AMUNDSON_RESPONSE_TO_ARSENITE                                                             | 205 | 2.11 | 0.000 | 0.000 |
| DALESSIO_TSA_RESPONSE                                                                     | 18  | 2.10 | 0.000 | 0.000 |
| CHIBA_RESPONSE_TO_TSA                                                                     | 38  | 2.10 | 0.000 | 0.000 |
| DIRMEIER_LMP1_RESPONSE_EARLY                                                              | 59  | 2.10 | 0.000 | 0.000 |
| REACTOME_APC_C:CDH1_MEDIATED_DEGRADATION_OF_CDC20_AND_OTHER_APC_C:C                       | 69  | 2.09 | 0.000 | 0.000 |
| DH1_TARGETED_PROTEINS_IN_LATE_MITOSIS_EARLY_G1                                            |     |      |       |       |
| KEGG_RIBOSOME                                                                             | 82  | 2.08 | 0.000 | 0.000 |
| REACTOME_CELLULAR_RESPONSES_TO_EXTERNAL_STIMULI                                           | 479 | 2.08 | 0.000 | 0.000 |
| REACTOME_INTERLEUKIN_1_FAMILY_SIGNALING                                                   | 121 | 2.08 | 0.000 | 0.000 |
| REACTOME_CELLULAR_RESPONSES_TO_STRESS                                                     | 396 | 2.08 | 0.000 | 0.000 |
| HARRIS_HYPOXIA                                                                            | 67  | 2.07 | 0.000 | 0.000 |
| REACTOME_ACTIVATION_OF_APC_C_AND_APC_C:CDC20_MEDIATED_DEGRADATION_OF<br>_MITOTIC_PROTEINS | 72  | 2.06 | 0.000 | 0.000 |
| REACTOME_ANTIGEN_PROCESSING:_UBIQUITINATION_PROTEASOME_DEGRADATION                        | 284 | 2.05 | 0.000 | 0.000 |
| SMIRNOV_RESPONSE_TO_IR_2HR_UP                                                             | 51  | 2.05 | 0.000 | 0.000 |
| WONG_PROTEASOME_GENE_MODULE                                                               | 50  | 2.03 | 0.000 | 0.001 |
| REACTOME_CDK_MEDIATED_PHOSPHORYLATION_AND_REMOVAL_OF_CDC6                                 | 68  | 2.03 | 0.000 | 0.001 |
| REACTOME_CLASS_I_MHC_MEDIATED_ANTIGEN_PROCESSING_PRESENTATION                             | 342 | 2.03 | 0.000 | 0.001 |
| REACTOME_CARBOXYTERMINAL_POST_TRANSLATIONAL_MODIFICATIONS_OF_TUBULIN                      | 34  | 2.03 | 0.000 | 0.001 |
| SESTO_RESPONSE_TO_UV_C0                                                                   | 99  | 2.03 | 0.000 | 0.001 |
| REACTOME_FC_EPSILON_RECEPTOR_FCERI_SIGNALING                                              | 127 | 2.03 | 0.000 | 0.001 |
| NAGASHIMA_EGF_SIGNALING_UP                                                                | 51  | 2.02 | 0.000 | 0.001 |
| AMIT_EGF_RESPONSE_40_HELA                                                                 | 38  | 2.02 | 0.000 | 0.001 |
| REACTOME_DISORDERS_OF_TRANSMEMBRANE_TRANSPORTERS                                          | 152 | 2.01 | 0.000 | 0.001 |
| REACTOME_ASSEMBLY_AND_CELL_SURFACE_PRESENTATION_OF_NMDA_RECEPTORS                         | 39  | 2.01 | 0.000 | 0.001 |



|                                                                                       |     |      |       |       |
|---------------------------------------------------------------------------------------|-----|------|-------|-------|
| KRIEG_HYPOXIA_VIA_KDM3A                                                               | 46  | 2.01 | 0.000 | 0.001 |
| UDAYAKUMAR_MED1_TARGETS_DN                                                            | 224 | 2.01 | 0.000 | 0.001 |
| SUH_COEXPRESSED_WITH_ID1_AND_ID2_UP                                                   | 16  | 2.00 | 0.000 | 0.001 |
| WINTER_HYPOXIA_METAGENE                                                               | 208 | 2.00 | 0.000 | 0.001 |
| REACTOME_UB_SPECIFIC_PROCESSING_PROTEASES                                             | 183 | 2.00 | 0.000 | 0.001 |
| REACTOME_TCR_SIGNALING                                                                | 107 | 2.00 | 0.000 | 0.001 |
| GRAHAM_CML QUIESCENT_VS_NORMAL_DIVIDING_UP                                            | 44  | 1.99 | 0.000 | 0.001 |
| REACTOME_NONSENSE_MEDIATED_DECAY_NMD_INDEPENDENT_OF_THE_EXON_JUNCT<br>ION_COMPLEX_EJC | 90  | 1.99 | 0.000 | 0.001 |
| RASHI_RESPONSE_TO_IONIZING_RADIATION_1                                                | 36  | 1.98 | 0.000 | 0.001 |
| REACTOME_GAP_JUNCTION_ASSEMBLY                                                        | 26  | 1.98 | 0.000 | 0.001 |
| REACTOME_AUTOPHAGY                                                                    | 104 | 1.98 | 0.000 | 0.001 |
| REACTOME_REGULATION_OF_HSF1_MEDIATED_HEAT_SHOCK_RESPONSE                              | 78  | 1.98 | 0.000 | 0.001 |
| MARKEY_RB1_CHRONIC_LOF_DN                                                             | 95  | 1.98 | 0.000 | 0.001 |
| GARGALOVIC_RESPONSE_TO_OXIDIZED_PHOSPHOLIPIDS_YELLOW_UP                               | 30  | 1.97 | 0.000 | 0.001 |
| DAZARD_UV_RESPONSE_CLUSTER_G4                                                         | 16  | 1.97 | 0.000 | 0.001 |
| APPIERTO_RESPONSE_TO_FENRETINIDE_UP                                                   | 31  | 1.97 | 0.000 | 0.001 |
| KIM_WT1_TARGETS_8HR_UP                                                                | 154 | 1.96 | 0.000 | 0.002 |
| NAKAYAMA_FRA2_TARGETS                                                                 | 40  | 1.96 | 0.000 | 0.002 |
| REACTOME_TRANSPORT_OF_CONNEXONS_TO_THE_PLASMA_MEMBRANE                                | 19  | 1.96 | 0.000 | 0.002 |
| PID_FRA_PATHWAY                                                                       | 31  | 1.96 | 0.000 | 0.002 |
| RHEIN_ALL_GLUCOCORTICOID_THERAPY_UP                                                   | 61  | 1.95 | 0.000 | 0.002 |
| REACTOME_PCP_CE_PATHWAY                                                               | 87  | 1.95 | 0.000 | 0.002 |
| YAO_TEMPORAL_RESPONSE_TO_PROGESTERONE_CLUSTER_1                                       | 56  | 1.95 | 0.002 | 0.002 |
| YAN_ESCAPE_FROM_ANOIKIS                                                               | 20  | 1.95 | 0.000 | 0.002 |
| REACTOME_PROGRAMMED_CELL_DEATH                                                        | 166 | 1.95 | 0.000 | 0.002 |
| REACTOME_REGULATED_NECROSIS                                                           | 20  | 1.95 | 0.000 | 0.002 |
| REACTOME_CYCLIN_A:CDK2_ASSOCIATED_EVENTS_AT_S_PHASE_ENTRY                             | 83  | 1.95 | 0.000 | 0.002 |
| DORSAM_HOXA9_TARGETS_DN                                                               | 29  | 1.95 | 0.000 | 0.002 |
| REACTOME_REGULATION_OF_MITOTIC_CELL_CYCLE                                             | 82  | 1.94 | 0.000 | 0.002 |
| REACTOME_COPI_MEDIATED_ANTEROGRADE_TRANSPORT                                          | 97  | 1.94 | 0.000 | 0.002 |
| REACTOME_MITOPHAGY                                                                    | 26  | 1.94 | 0.000 | 0.002 |
| REACTOME_INTERLEUKIN_4_AND_INTERLEUKIN_13_SIGNALING                                   | 87  | 1.94 | 0.000 | 0.002 |
| DAZARD_UV_RESPONSE_CLUSTER_G24                                                        | 16  | 1.94 | 0.002 | 0.002 |
| REACTOME_SIGNALING_BY_ROBO_RECEPTORS                                                  | 202 | 1.93 | 0.000 | 0.002 |
| DEN_INTERACT_WITH_LCA5                                                                | 25  | 1.93 | 0.002 | 0.002 |
| REACTOME_IRON_UPTAKE_AND_TRANSPORT                                                    | 53  | 1.92 | 0.000 | 0.003 |
| REACTOME_DEUBIQUITINATION                                                             | 255 | 1.92 | 0.000 | 0.003 |
| ZHANG_RESPONSE_TO_IKK_INHIBITOR_AND_TNF_UP                                            | 194 | 1.92 | 0.000 | 0.003 |
| REACTOME_NONSENSE_MEDIATED_DECAY_NMD                                                  | 110 | 1.92 | 0.000 | 0.003 |
| REACTOME_TRANSCRIPTIONAL_REGULATION_BY_RUNX2                                          | 108 | 1.92 | 0.000 | 0.003 |
| SARRIO_EPITHELIAL_MESENCHYMAL_TRANSITION_DN                                           | 129 | 1.92 | 0.000 | 0.003 |

|                                                                                                                |     |      |       |       |
|----------------------------------------------------------------------------------------------------------------|-----|------|-------|-------|
| REACTOME_SIGNALING_BY_THE_B_CELL_RECEPTOR_BCR                                                                  | 105 | 1.92 | 0.000 | 0.003 |
| BILANGES_SERUM_AND_RAPAMYCIN_SENSITIVE_GENES                                                                   | 46  | 1.92 | 0.000 | 0.003 |
| DAUER_STAT3_TARGETS_UP                                                                                         | 39  | 1.92 | 0.002 | 0.003 |
| AMIT_DELAYED_EARLY_GENES                                                                                       | 18  | 1.92 | 0.000 | 0.003 |
| DEBIASI_APOPTOSIS_BY_REOVIRUS_INFECTION_UP                                                                     | 275 | 1.91 | 0.000 | 0.003 |
| REACTOME_RUNX1_REGULATES_TRANSCRIPTION_OF_GENES_INVOLVED_IN_DIFFERENTIATION_OF_HSCS                            | 108 | 1.91 | 0.000 | 0.003 |
| AMIT_SERUM_RESPONSE_120_MCF10A                                                                                 | 65  | 1.91 | 0.000 | 0.003 |
| AMIT_SERUM_RESPONSE_40_MCF10A                                                                                  | 29  | 1.90 | 0.000 | 0.003 |
| REACTOME_PINK_PARKIN_MEDIATED_MITOPHAGY                                                                        | 19  | 1.90 | 0.000 | 0.003 |
| AMIT_EGF_RESPONSE_60_HELA                                                                                      | 41  | 1.90 | 0.000 | 0.003 |
| WENG_POR_DOSAGE                                                                                                | 15  | 1.90 | 0.000 | 0.003 |
| REACTOME_ACTIVATION_OF_THE_MRNA_UPON_BINDING_OF_THE_CAP_BINDING_COMPLEX_AND_EIF5_AND_SUBSEQUENT_BINDING_TO_43S | 57  | 1.90 | 0.000 | 0.003 |
| FALVELLA_SMOKERS_WITH_LUNG_CANCER                                                                              | 70  | 1.90 | 0.000 | 0.003 |
| REACTOME_PTEN_REGULATION                                                                                       | 132 | 1.90 | 0.000 | 0.003 |
| ABRAHAM_ALPC_VS_MULTIPLE_MYELOMA_UP                                                                            | 22  | 1.90 | 0.002 | 0.003 |
| VARELA_ZMPSTE24_TARGETS_UP                                                                                     | 40  | 1.90 | 0.000 | 0.003 |
| REACTOME_ASSEMBLY_OF_THE_PRE_REPLICATIVE_COMPLEX                                                               | 65  | 1.90 | 0.000 | 0.003 |
| MCDOWELL_ACUTE_LUNG_INJURY_UP                                                                                  | 37  | 1.89 | 0.000 | 0.004 |
| REACTOME_MITOTIC_G2_G2_M_PHASES                                                                                | 193 | 1.89 | 0.000 | 0.004 |
| REACTOME_ORC1_REMOVAL_FROM_CHROMATIN                                                                           | 67  | 1.89 | 0.000 | 0.004 |
| GENTILE_UV_HIGH_DOSE_UP                                                                                        | 18  | 1.89 | 0.000 | 0.004 |
| REACTOME_HOST_INTERACTIONS_OF_HIV_FACTORS                                                                      | 121 | 1.88 | 0.000 | 0.004 |
| REACTOME_MAP3K8_TPL2_DEPENDENT_MAPK1_3_ACTIVATION                                                              | 16  | 1.88 | 0.000 | 0.004 |
| SEMENZA_HIF1_TARGETS                                                                                           | 33  | 1.88 | 0.000 | 0.004 |
| BAKKER_FOXO3_TARGETS_UP                                                                                        | 50  | 1.87 | 0.002 | 0.005 |
| ZWANG_CLASS_2_TRANSIENTLY_INDUCED_BY_EGF                                                                       | 38  | 1.87 | 0.000 | 0.005 |
| LIAN_LIPA_TARGETS_6M                                                                                           | 51  | 1.87 | 0.000 | 0.005 |
| ENK_UV_RESPONSE_KERATINOCYTE_UP                                                                                | 458 | 1.87 | 0.000 | 0.005 |
| REACTOME_POST_CHAPERONIN_TUBULIN_FOLDING_PATHWAY                                                               | 22  | 1.87 | 0.004 | 0.005 |
| CAFFAREL_RESPONSE_TO_THC_UP                                                                                    | 32  | 1.87 | 0.000 | 0.005 |
| HAN_JNK_SIGNALING_UP                                                                                           | 29  | 1.86 | 0.000 | 0.005 |
| REACTOME_INFECTIOUS_DISEASE                                                                                    | 356 | 1.86 | 0.000 | 0.005 |
| GRAHAM_NORMAL QUIESCENT VS NORMAL DIVIDING UP                                                                  | 49  | 1.86 | 0.000 | 0.005 |
| PRAMOONJAGO_SOX4_TARGETS_UP                                                                                    | 49  | 1.86 | 0.000 | 0.006 |
| LIAN_LIPA_TARGETS_3M                                                                                           | 42  | 1.86 | 0.000 | 0.006 |
| ODONNELL_TARGETS_OF_MYC_AND_TFRC_UP                                                                            | 71  | 1.86 | 0.000 | 0.006 |
| REACTOME_GAP_JUNCTION_TRAFFICKING_AND_REGULATION                                                               | 39  | 1.85 | 0.000 | 0.006 |
| REACTOME_FORMATION_OF_TUBULIN_FOLDING_INTERMEDIATES_BY_CCT_TRIC                                                | 25  | 1.85 | 0.002 | 0.006 |
| LAMB_CCND1_TARGETS                                                                                             | 17  | 1.85 | 0.000 | 0.006 |
| FERRARI_RESPONSE_TO_FENRETINIDE_UP                                                                             | 20  | 1.84 | 0.000 | 0.007 |

|                                                       |     |      |       |       |
|-------------------------------------------------------|-----|------|-------|-------|
| REACTOME_MACROAUTOPHAGY                               | 86  | 1.84 | 0.000 | 0.007 |
| REACTOME_NEDDYLATION                                  | 219 | 1.84 | 0.000 | 0.007 |
| MISSIAGLIA_REGULATED_BY_METHYLATION_UP                | 108 | 1.83 | 0.000 | 0.007 |
| GARGALOVIC_RESPONSE_TO_OXIDIZED_PHOSPHOLIPIDS_GREY_UP | 17  | 1.83 | 0.006 | 0.008 |
| PETROVA_ENDOTHELIUM_LYMPHATIC_VS_BLOOD_DN             | 138 | 1.83 | 0.000 | 0.008 |
| RASHI_RESPONSE_TO_IONIZING_RADIATION_2                | 103 | 1.83 | 0.000 | 0.008 |
| REACTOME_GOLGI_TO_ER_RETROGRADE_TRANSPORT             | 125 | 1.83 | 0.000 | 0.008 |
| REACTOME_ACTIVATION_OF_AMPK_DOWNSTREAM_OF_NMDARS      | 26  | 1.83 | 0.000 | 0.008 |
| TIAN_TNF_SIGNALING_NOT_VIA_NFKB                       | 22  | 1.82 | 0.002 | 0.008 |
| PHONG_TNF_TARGETS_UP                                  | 58  | 1.82 | 0.000 | 0.009 |
| ZWANG_CLASS_1_TRANSIENTLY_INDUCED_BY_EGF              | 434 | 1.82 | 0.000 | 0.009 |
| WIERENGA_STAT5A_TARGETS_GROUP2                        | 45  | 1.82 | 0.000 | 0.009 |
| KIM_WT1_TARGETS_12HR_UP                               | 146 | 1.81 | 0.000 | 0.009 |
| PELLICCIOTTA_HDAC_IN_ANTIGEN_PRESENTATION_UP          | 59  | 1.81 | 0.000 | 0.009 |
| REACTOME_INFLUENZA_INFECTION                          | 147 | 1.81 | 0.000 | 0.010 |
| REACTOME_MITOTIC_METAPHASE_AND_ANAPHASE               | 191 | 1.81 | 0.000 | 0.010 |
| GROSS_HYPOXIA_VIA_ELK3_ONLY_UP                        | 25  | 1.81 | 0.002 | 0.010 |

## Supplementary Table S6.

Significantly downregulated gene sets in MM.1S cells treated with combination treatment of PTC596 with bortezomib.

Gene set enrichment analysis using our RNA-seq data identified gene sets, which were significantly downregulated in MM.1S cells treated with the combination treatment versus control. (FDR w-value <0.01).

### Hallmark

| NAME                             | SIZE | NES   | NOM p-val | FDR q-val |
|----------------------------------|------|-------|-----------|-----------|
| HALLMARK_E2F_TARGETS             | 196  | -2.48 | 0.000     | 0.000     |
| HALLMARK_G2M_CHECKPOINT          | 189  | -1.88 | 0.000     | 0.001     |
| HALLMARK_CHOLESTEROL_HOMEOSTASIS | 72   | -1.73 | 0.004     | 0.007     |

### c2.all.v7.0

| NAME                                          | SIZE | NES   | NOM p-val | FDR q-val |
|-----------------------------------------------|------|-------|-----------|-----------|
| DUTERTRE_ESTRADIOL_RESPONSE_24HR_UP           | 303  | -2.64 | 0.000     | 0.000     |
| ROSTY_CERVICAL_CANCER_PROLIFERATION_CLUSTER   | 135  | -2.55 | 0.000     | 0.000     |
| VERNELL_RETINOBLASTOMA_PATHWAY_UP             | 69   | -2.52 | 0.000     | 0.000     |
| CONCANNON_APOPTOSIS_BY_EPOXOMICIN_DN          | 156  | -2.49 | 0.000     | 0.000     |
| ZHOU_CELL_CYCLE_GENES_IN_IR_RESPONSE_6HR      | 79   | -2.49 | 0.000     | 0.000     |
| MISSIAGLIA_REGULATED_BY_METHYLATION_DN        | 115  | -2.42 | 0.000     | 0.000     |
| GRAHAM_NORMAL QUIESCENT VS NORMAL DIVIDING_DN | 85   | -2.42 | 0.000     | 0.000     |
| GRAHAM_CML_DIVIDING VS NORMAL QUIESCENT_UP    | 169  | -2.42 | 0.000     | 0.000     |
| RUIZ_TNC_TARGETS_DN                           | 140  | -2.41 | 0.000     | 0.000     |
| ZHOU_CELL_CYCLE_GENES_IN_IR_RESPONSE_24HR     | 116  | -2.40 | 0.000     | 0.000     |
| KOBAYASHI_EGFR_SIGNALING_24HR_DN              | 244  | -2.37 | 0.000     | 0.000     |
| ISHIDA_E2F_TARGETS                            | 50   | -2.36 | 0.000     | 0.000     |
| SONG_TARGETS_OF_IE86_CMV_PROTEIN              | 54   | -2.36 | 0.000     | 0.000     |
| BURTON_ADIPOGENESIS_3                         | 96   | -2.34 | 0.000     | 0.000     |
| FUJII_YBX1_TARGETS_DN                         | 187  | -2.33 | 0.000     | 0.000     |
| REN_BOUND_BY_E2F                              | 60   | -2.32 | 0.000     | 0.000     |
| ALCALAY_AML_BY_NPM1_LOCALIZATION_DN           | 169  | -2.32 | 0.000     | 0.000     |
| PUJANA_XPRSS_INT_NETWORK                      | 161  | -2.30 | 0.000     | 0.000     |
| PUJANA_BRCA2_PCC_NETWORK                      | 403  | -2.30 | 0.000     | 0.000     |
| PUJANA_BRCA_CENTERED_NETWORK                  | 116  | -2.26 | 0.000     | 0.000     |
| WHITEFORD_PEDIATRIC_CANCER_MARKERS            | 111  | -2.25 | 0.000     | 0.000     |
| FISCHER_G1_S_CELL_CYCLE                       | 188  | -2.25 | 0.000     | 0.000     |
| CROONQUIST_IL6_DEPRIVATION_DN                 | 93   | -2.23 | 0.000     | 0.000     |
| REACTOME_DNA_STRAND_ELONGATION                | 32   | -2.23 | 0.000     | 0.000     |
| KAUFFMANN_MELANOMA_RELAPSE_UP                 | 61   | -2.22 | 0.000     | 0.000     |
| BLUM_RESPONSE_TO_SALIRASIB_DN                 | 320  | -2.22 | 0.000     | 0.000     |
| KEGG_DNA_REPLICATION                          | 36   | -2.20 | 0.000     | 0.000     |

|                                                                  |     |       |       |       |
|------------------------------------------------------------------|-----|-------|-------|-------|
| AFFAR_YY1_TARGETS_DN                                             | 197 | -2.20 | 0.000 | 0.000 |
| SCHMIDT_POR_TARGETS_IN_LIMB_BUD_UP                               | 24  | -2.20 | 0.000 | 0.000 |
| PYEON_HPV_POSITIVE_TUMORS_UP                                     | 86  | -2.19 | 0.000 | 0.000 |
| FOURNIER_ACINAR_DEVELOPMENT_LATE_2                               | 273 | -2.18 | 0.000 | 0.000 |
| STEIN_ESRRA_TARGETS_RESPONSIVE_TO_ESTROGEN_DN                    | 39  | -2.18 | 0.000 | 0.000 |
| SARRIO_EPITHELIAL_MESENCHYMAL_TRANSITION_UP                      | 175 | -2.17 | 0.000 | 0.000 |
| CHICAS_RB1_TARGETS_GROWING                                       | 214 | -2.16 | 0.000 | 0.000 |
| KONG_E2F3_TARGETS                                                | 91  | -2.15 | 0.000 | 0.000 |
| REACTOME_CHOLESTEROL_BIOSYNTHESIS                                | 24  | -2.15 | 0.000 | 0.000 |
| WENG_POR_TARGETS_GLOBAL_UP                                       | 16  | -2.14 | 0.000 | 0.000 |
| LEE_EARLY_T_LYMPHOCYTE_UP                                        | 99  | -2.14 | 0.000 | 0.000 |
| PUJANA_BREAST_CANCER_WITH_BRCA1_MUTATED_UP                       | 54  | -2.14 | 0.000 | 0.000 |
| MARKEY_RB1_ACUTE_LOF_UP                                          | 214 | -2.13 | 0.000 | 0.000 |
| REACTOME_EXTENSION_OF_TELOMERES                                  | 30  | -2.13 | 0.000 | 0.000 |
| MITSIADES_RESPONSE_TO_APLIDIN_DN                                 | 241 | -2.12 | 0.000 | 0.000 |
| MARKEY_RB1_CHRONIC_LOF_UP                                        | 98  | -2.11 | 0.000 | 0.000 |
| CHICAS_RB1_TARGETS_SENESCENT                                     | 488 | -2.10 | 0.000 | 0.000 |
| BILD_E2F3_ONCOGENIC_SIGNATURE                                    | 223 | -2.10 | 0.000 | 0.000 |
| REACTOME_ACTIVATION_OF_THE_PRE_REPLICATIVE_COMPLEX               | 33  | -2.09 | 0.000 | 0.000 |
| REACTOME_ACTIVATION_OF_ATR_IN_RESPONSE_TO_REPLICATION_STR<br>ESS | 37  | -2.09 | 0.000 | 0.000 |
| MANALO_HYPOXIA_DN                                                | 283 | -2.09 | 0.000 | 0.000 |
| FRASOR_RESPONSE_TO_SERM_OR_FULVESTRANT_DN                        | 45  | -2.09 | 0.000 | 0.000 |
| MORI_IMMATURE_B_LYMPHOCYTE_DN                                    | 86  | -2.09 | 0.000 | 0.000 |
| SCHUHMACHER_MYC_TARGETS_UP                                       | 78  | -2.07 | 0.000 | 0.000 |
| BENPORATH_ES_2                                                   | 35  | -2.07 | 0.000 | 0.000 |
| MOLENAAR_TARGETS_OF_CCND1_AND_CDK4_DN                            | 52  | -2.07 | 0.000 | 0.000 |
| CHIANG_LIVER_CANCER_SUBCLASS_PROLIFERATION_UP                    | 163 | -2.07 | 0.000 | 0.000 |
| CUI_TCF21_TARGETS_2_UP                                           | 352 | -2.07 | 0.000 | 0.000 |
| KANG_DOXORUBICIN_RESISTANCE_UP                                   | 52  | -2.06 | 0.000 | 0.000 |
| CROONQUIST_NRAS_SIGNALING_DN                                     | 69  | -2.06 | 0.000 | 0.000 |
| REACTOME_HDR_THROUGH_SINGLE_STRAND_ANNEALING_SSA                 | 36  | -2.05 | 0.000 | 0.000 |
| FERRANDO_HOX11_NEIGHBORS                                         | 17  | -2.05 | 0.000 | 0.000 |
| FLORIO_NEOCORTEX_BASAL_RADIAL_GLIA_DN                            | 166 | -2.05 | 0.000 | 0.000 |
| WHITFIELD_CELL_CYCLE_LITERATURE                                  | 41  | -2.05 | 0.000 | 0.000 |
| MORI_EMU_MYC_LYMPHOMA_BY_ONSET_TIME_UP                           | 102 | -2.05 | 0.000 | 0.000 |
| GAL_LEUKEMIC_STEM_CELL_DN                                        | 173 | -2.05 | 0.000 | 0.000 |
| LE_EGR2_TARGETS_UP                                               | 101 | -2.05 | 0.000 | 0.000 |
| SOTIRIOU_BREAST_CANCER_GRADE_1_VS_3_UP                           | 147 | -2.04 | 0.000 | 0.000 |
| BURTON_ADIPOGENESIS_PEAK_AT_16HR                                 | 38  | -2.04 | 0.000 | 0.000 |
| KAMMINGA_EZH2_TARGETS                                            | 41  | -2.04 | 0.000 | 0.000 |
| EGUCHI_CELL_CYCLE_RB1_TARGETS                                    | 23  | -2.04 | 0.000 | 0.000 |

|                                                                  |     |       |       |       |
|------------------------------------------------------------------|-----|-------|-------|-------|
| SMID_BREAST_CANCER_RELAPSE_IN_BRAIN_UP                           | 27  | -2.03 | 0.000 | 0.000 |
| SENGUPTA_NASOPHARYNGEAL_CARCINOMA_UP                             | 276 | -2.03 | 0.000 | 0.000 |
| REACTOME_HOMOLOGOUS_DNA_PAIRING_AND_STRAND_EXCHANGE              | 41  | -2.03 | 0.000 | 0.000 |
| REACTOME_TELOMERE_C_STRAND_LAGGING_STRAND_SYNTHESIS              | 24  | -2.03 | 0.000 | 0.000 |
| SUNG_METASTASIS_STROMA_DN                                        | 47  | -2.03 | 0.000 | 0.000 |
| WHITFIELD_CELL_CYCLE_G1_S                                        | 125 | -2.01 | 0.000 | 0.000 |
| TAKEDA_TARGETS_OF_NUP98_HOXA9_FUSION_16D_UP                      | 138 | -2.01 | 0.000 | 0.000 |
| GARGALOVIC_RESPONSE_TO_OXIDIZED_PHOSPHOLIPIDS_TURQUOISE_DN       | 53  | -2.00 | 0.000 | 0.001 |
| ZHAN_MULTIPLE_MYELOMA_PR_UP                                      | 43  | -2.00 | 0.000 | 0.001 |
| TORCHIA_TARGETS_OF_EWSR1_FLI1_FUSION_DN                          | 271 | -2.00 | 0.000 | 0.001 |
| REACTOME_FATTY_ACYL_COA_BIOSYNTHESIS                             | 34  | -1.98 | 0.000 | 0.001 |
| REACTOME_REGULATION_OF_CHOLESTEROL_BIOSYNTHESIS_BY_SREBP_P_SREBF | 55  | -1.98 | 0.000 | 0.001 |
| REACTOME_ACTIVATION_OF_GENE_EXPRESSION_BY_SREBF_SREBP            | 42  | -1.98 | 0.000 | 0.001 |
| BOYVAULT_LIVER_CANCER_SUBCLASS_G23_UP                            | 52  | -1.98 | 0.000 | 0.001 |
| DUTERTRE ESTRADIOL_RESPONSE_6HR_UP                               | 214 | -1.98 | 0.000 | 0.001 |
| KEGG_BUTANOATE_METABOLISM                                        | 29  | -1.98 | 0.000 | 0.001 |
| ODONNELL_TFRC_TARGETS_DN                                         | 120 | -1.97 | 0.000 | 0.001 |
| STEIN_ESR1_TARGETS                                               | 73  | -1.97 | 0.000 | 0.001 |
| HORTON_SREBF_TARGETS                                             | 23  | -1.97 | 0.000 | 0.001 |
| YU_MYC_TARGETS_UP                                                | 40  | -1.97 | 0.000 | 0.001 |
| BENPORATH_ES_1                                                   | 341 | -1.97 | 0.000 | 0.001 |
| HOFFMANN_LARGE_TO_SMALL_PRE_BII_LYMPHOCYTE_UP                    | 142 | -1.97 | 0.000 | 0.001 |
| REACTOME_PCNA_DEPENDENT_LONG_PATCH_BASE_EXCISION_REPAIR          | 21  | -1.95 | 0.002 | 0.001 |
| VALK_AML_CLUSTER_10                                              | 24  | -1.95 | 0.000 | 0.001 |
| SHEDDEN_LUNG_CANCER_POOR_SURVIVAL_A6                             | 428 | -1.94 | 0.000 | 0.001 |
| KEGG_BIOSYNTHESIS_OF_UNSATURATED_FATTY_ACIDS                     | 18  | -1.94 | 0.000 | 0.001 |
| BIOCARTA_MCM_PATHWAY                                             | 18  | -1.93 | 0.000 | 0.002 |
| JAATINEN_HEMATOPOIETIC_STEM_CELL_UP                              | 272 | -1.93 | 0.000 | 0.002 |
| BURTON_ADIPOGENESIS_PEAK_AT_24HR                                 | 38  | -1.93 | 0.000 | 0.002 |
| RHEIN_ALL_GLUCCORTICOID_THERAPY_DN                               | 350 | -1.93 | 0.000 | 0.002 |
| KYNG_WERNER_SYNDROM_DN                                           | 17  | -1.93 | 0.000 | 0.002 |
| MORI_LARGE_PRE_BII_LYMPHOCYTE_UP                                 | 81  | -1.93 | 0.000 | 0.002 |
| HORIUCHI_WTAP_TARGETS_DN                                         | 294 | -1.92 | 0.000 | 0.002 |
| PAL_PRMT5_TARGETS_UP                                             | 179 | -1.92 | 0.000 | 0.002 |
| VILLANUEVA_LIVER_CANCER_KRT19_UP                                 | 164 | -1.92 | 0.000 | 0.002 |
| KEGG_STEROID_BIOSYNTHESIS                                        | 17  | -1.92 | 0.000 | 0.002 |
| REACTOME_LAGGING_STRAND_SYNTHESIS                                | 20  | -1.92 | 0.000 | 0.002 |
| REACTOME_RESOLUTION_OF_D_LOOP_STRUCTURES                         | 31  | -1.92 | 0.000 | 0.002 |
| LI_WILMS_TUMOR_VS_FETAL_KIDNEY_1_DN                              | 155 | -1.91 | 0.000 | 0.002 |
| REACTOME_RESOLUTION_OF_AP_SITES_VIA_THE_MULTIPLE_NUCLEOTI        | 25  | -1.91 | 0.004 | 0.002 |

|                                                       |     |       |       |       |
|-------------------------------------------------------|-----|-------|-------|-------|
| DE_PATCH_REPLACEMENT_PATHWAY                          |     |       |       |       |
| WANG_RESPONSE_TO_GSK3_INHIBITOR_SB216763_DN           | 336 | -1.90 | 0.000 | 0.002 |
| MEISSNER_BRAIN_HCP_WITH_H3_UNMETHYLATED               | 25  | -1.90 | 0.000 | 0.002 |
| ZHAN_MULTIPLE_MYELOMA_CD1_VS_CD2_DN                   | 47  | -1.90 | 0.000 | 0.002 |
| KEGG_MISMATCH_REPAIR                                  | 23  | -1.90 | 0.000 | 0.002 |
| PID_BARD1_PATHWAY                                     | 28  | -1.90 | 0.000 | 0.002 |
| TANG_SENESCENCE_TP53_TARGETS_DN                       | 51  | -1.90 | 0.000 | 0.002 |
| REACTOME_METABOLISM_OF_STEROIDS                       | 123 | -1.90 | 0.000 | 0.002 |
| SERVITJA_LIVER_HNF1A_TARGETS_DN                       | 114 | -1.90 | 0.000 | 0.002 |
| VANHARANTA_UTERINE_FIBROID_UP                         | 37  | -1.90 | 0.000 | 0.002 |
| MORI_MATURE_B_LYMPHOCYTE_DN                           | 67  | -1.89 | 0.000 | 0.002 |
| LY_AGING_PREMATURE_DN                                 | 27  | -1.89 | 0.002 | 0.002 |
| REACTOME_RESOLUTION_OF_ABASIC_SITES_AP_SITES          | 38  | -1.89 | 0.000 | 0.002 |
| KRASNOSELSKAYA_ILF3_TARGETS_DN                        | 38  | -1.89 | 0.000 | 0.002 |
| JACKSON_DNMT1_TARGETS_DN                              | 15  | -1.89 | 0.002 | 0.002 |
| BENPORATH_PROLIFERATION                               | 140 | -1.89 | 0.000 | 0.003 |
| REACTOME_CYTOSOLIC_SULFONATION_OF_SMALL_MOLECULES     | 17  | -1.88 | 0.000 | 0.003 |
| WINNEPENNINGCKX_MELANOMA_METASTASIS_UP                | 156 | -1.88 | 0.000 | 0.003 |
| CHEN_ETV5_TARGETS_TESTIS                              | 19  | -1.88 | 0.000 | 0.003 |
| SHAFFER_IRF4_TARGETS_IN_ACTIVATED_DENDRITIC_CELL      | 62  | -1.88 | 0.000 | 0.003 |
| KEGG_HEMATOPOIETIC_CELL_LINEAGE                       | 54  | -1.88 | 0.000 | 0.003 |
| REACTOME_TELOMERE_MAINTENANCE                         | 68  | -1.88 | 0.000 | 0.003 |
| REACTOME_CHROMOSOME_MAINTENANCE                       | 92  | -1.87 | 0.000 | 0.003 |
| LI_INDUCED_T_TO_NATURAL_KILLER_DN                     | 121 | -1.87 | 0.000 | 0.003 |
| REACTOME_RESOLUTION_OF_D_LOOP_STRUCTURES_THROUGH_SYNT | 25  | -1.86 | 0.002 | 0.004 |
| HESIS_DEPENDENT_STRAND_ANNEALING_SDSA                 |     |       |       |       |
| MORI_PRE_BI_LYMPHOCYTE_UP                             | 74  | -1.86 | 0.000 | 0.004 |
| ZHANG_BREAST_CANCER_PROGENITORS_UP                    | 396 | -1.85 | 0.000 | 0.004 |
| ODONNELL_TARGETS_OF_MYC_AND_TFRC_DN                   | 43  | -1.85 | 0.000 | 0.004 |
| KIM_MYCN_AMPLIFICATION_TARGETS_UP                     | 82  | -1.84 | 0.000 | 0.005 |
| LINDGREN_BLADDER_CANCER_CLUSTER_3_UP                  | 306 | -1.84 | 0.000 | 0.005 |
| PETROVA_ENDOTHELIUM_LYMPHATIC_VS_BLOOD_UP             | 112 | -1.83 | 0.000 | 0.006 |
| REACTOME_MISMATCH_REPAIR                              | 15  | -1.83 | 0.000 | 0.006 |
| KEGG_BASE_EXCISION_REPAIR                             | 33  | -1.83 | 0.000 | 0.006 |
| PODAR_RESPONSE_TO_ADAPHOSTIN_DN                       | 16  | -1.83 | 0.002 | 0.006 |
| WANG_CISPLATIN_RESPONSE_AND_XPC_UP                    | 154 | -1.83 | 0.000 | 0.006 |
| KAUFFMANN_DNA_REPAIR_GENES                            | 225 | -1.82 | 0.000 | 0.007 |
| VERHAAK_AML_WITH_NPM1_MUTATED_DN                      | 200 | -1.82 | 0.000 | 0.007 |
| WONG_EMBRYONIC_STEM_CELL_CORE                         | 325 | -1.81 | 0.000 | 0.008 |
| BOYLAN_MULTIPLE_MYELOMA_C_UP                          | 43  | -1.80 | 0.000 | 0.008 |
| TOYOTA_TARGETS_OF_MIR34B_AND_MIR34C                   | 417 | -1.80 | 0.000 | 0.009 |
| ZHENG_GLIOMASTOMA_PLASTICITY_UP                       | 209 | -1.80 | 0.000 | 0.009 |

|                                                   |     |       |       |       |
|---------------------------------------------------|-----|-------|-------|-------|
| SCHAEFFER_SOX9_TARGETS_IN_PROSTATE_DEVELOPMENT_DN | 40  | -1.80 | 0.000 | 0.009 |
| SLEBOS_HEAD_AND_NECK_CANCER_WITH_HP_V_UP          | 72  | -1.79 | 0.000 | 0.009 |
| VECCHI_GASTRIC_CANCER_EARLY_UP                    | 388 | -1.79 | 0.000 | 0.010 |



## Supplementary Table S7.

Enriched pathways and processes characteristic of upregulated genes in both PTC596 single and bortezomib single in our RNA-seq (FDR  $p < 0.05$ , top 50).

| term_id            | term_name                                                                    | p_value      | negative_log10_of_p_value |
|--------------------|------------------------------------------------------------------------------|--------------|---------------------------|
| GO:0003735         | structural constituent of ribosome                                           | 0.000        | 280.9                     |
| GO:0044391         | ribosomal subunit                                                            | 0.000        | 276.0                     |
| KEGG:03010         | Ribosome                                                                     | 0.000        | 269.5                     |
| GO:0005840         | ribosome                                                                     | 0.000        | 256.2                     |
| REAC:R-HSA-72766   | Translation                                                                  | 0.000        | 203.7                     |
| GO:0005198         | structural molecule activity                                                 | 0.000        | 177.3                     |
| GO:0006412         | translation                                                                  | 0.000        | 176.0                     |
| GO:0043043         | peptide biosynthetic process                                                 | 0.000        | 174.1                     |
| GO:0022626         | cytosolic ribosome                                                           | 0.000        | 174.0                     |
| GO:1990904         | ribonucleoprotein complex                                                    | 0.000        | 172.5                     |
| WP:WP477           | Cytoplasmic Ribosomal Proteins                                               | 0.000        | 167.0                     |
| GO:0006518         | peptide metabolic process                                                    | 0.000        | 163.9                     |
| GO:0043604         | amide biosynthetic process                                                   | 0.000        | 163.9                     |
| REAC:R-HSA-156902  | Peptide chain elongation                                                     | 0.000        | 157.0                     |
| REAC:R-HSA-192823  | Viral mRNA Translation                                                       | 0.000        | 157.0                     |
| GO:0006614         | SRP-dependent cotranslational protein targeting to membrane                  | 0.000        | 155.0                     |
| GO:0015934         | large ribosomal subunit                                                      | 0.000        | 154.3                     |
| REAC:R-HSA-2408557 | Selenocysteine synthesis                                                     | 0.000        | 153.4                     |
| REAC:R-HSA-156842  | Eukaryotic Translation Elongation                                            | 0.000        | 153.4                     |
| REAC:R-HSA-72764   | Eukaryotic Translation Termination                                           | 0.000        | 153.4                     |
| REAC:R-HSA-975956  | Nonsense Mediated Decay (NMD) independent of the Exon Junction Complex (EJC) | 0.000        | 151.7                     |
| GO:0006613         | cotranslational protein targeting to membrane                                | 0.000        | 151.7                     |
| GO:0043603         | cellular amide metabolic process                                             | 0.000        | 148.5                     |
| REAC:R-HSA-72689   | Formation of a pool of free 40S subunits                                     | 0.000        | 147.3                     |
| <b>GO:0045047</b>  | <b>protein targeting to ER</b>                                               | <b>0.000</b> | <b>147.1</b>              |
| <b>GO:0072599</b>  | <b>establishment of protein localization to endoplasmic reticulum</b>        | <b>0.000</b> | <b>145.1</b>              |
| REAC:R-HSA-156827  | L13a-mediated translational silencing of Ceruloplasmin expression            | 0.000        | 141.3                     |
| GO:0000184         | nuclear-transcribed mRNA catabolic process, nonsense-mediated decay          | 0.000        | 141.0                     |
| REAC:R-HSA-72706   | GTP hydrolysis and joining of the 60S ribosomal subunit                      | 0.000        | 140.7                     |
| REAC:R-HSA-1799339 | SRP-dependent cotranslational protein targeting to membrane                  | 0.000        | 140.7                     |
| REAC:R-HSA-975957  | Nonsense Mediated Decay (NMD) enhanced by the Exon Junction Complex (EJC)    | 0.000        | 139.1                     |
| REAC:R-HSA-927802  | Nonsense-Mediated Decay (NMD)                                                | 0.000        | 139.1                     |

|                    |                                                               |       |       |
|--------------------|---------------------------------------------------------------|-------|-------|
| REAC:R-HSA-2408522 | Selenoamino acid metabolism                                   | 0.000 | 138.6 |
| REAC:R-HSA-72737   | Cap-dependent Translation Initiation                          | 0.000 | 137.1 |
| REAC:R-HSA-72613   | Eukaryotic Translation Initiation                             | 0.000 | 137.1 |
| GO:0070972         | protein localization to endoplasmic reticulum                 | 0.000 | 135.1 |
| GO:0044445         | cytosolic part                                                | 0.000 | 131.9 |
| REAC:R-HSA-168273  | Influenza Viral RNA Transcription and Replication             | 0.000 | 131.4 |
| REAC:R-HSA-168255  | Influenza Life Cycle                                          | 0.000 | 128.0 |
| REAC:R-HSA-168254  | Influenza Infection                                           | 0.000 | 124.2 |
| GO:0019083         | viral transcription                                           | 0.000 | 123.4 |
| GO:1901566         | organonitrogen compound biosynthetic process                  | 0.000 | 120.5 |
| GO:0019080         | viral gene expression                                         | 0.000 | 120.1 |
| CORUM:306          | Ribosome, cytoplasmic                                         | 0.000 | 119.9 |
| GO:0006612         | protein targeting to membrane                                 | 0.000 | 119.5 |
| GO:0006413         | translational initiation                                      | 0.000 | 118.8 |
| REAC:R-HSA-9010553 | Regulation of expression of SLITs and ROBOs                   | 0.000 | 118.8 |
| GO:0000956         | nuclear-transcribed mRNA catabolic process                    | 0.000 | 116.2 |
| REAC:R-HSA-6791226 | Major pathway of rRNA processing in the nucleolus and cytosol | 0.000 | 115.7 |

## Supplementary Table S8.

List of primers used for Quantitative RT-PCR.

Sequences of primers used for quantitative real time PCR.

| Target Gene  | Primers | Sequences (5' to 3')         |
|--------------|---------|------------------------------|
| <i>BMI1</i>  | Forward | CGTGTATTGTTTCGTTACCTGGA      |
|              | Reverse | TTCAGTAGTGGTCTGGTCTTGT       |
| <i>mBmi1</i> | Forward | AAACCAGACCACTCCTGAACA        |
|              | Reverse | TCTTCTTCTCTTCATCTCATTTTTGA   |
| <i>DDIT3</i> | Forward | AGAACCAGGAAACGGAAACAGA       |
|              | Reverse | TCTCCTTCATGCGCTGCTTT         |
| <i>HSPA5</i> | Forward | CAATCAAGGTCTATGAAGGTGAAAGA   |
|              | Reverse | CACATCTATCTCAAAGGTGACTTCAATC |
| <i>ATF4</i>  | Forward | CCCTTCACCTTCTTACAACCTC       |
|              | Reverse | TGCCCAGCTCTAAACTAAAGGA       |
| <i>GAPDH</i> | Forward | CTGACTTCAACAGCGACACC         |
|              | Reverse | TAGCCAAATTCGTTGTCATACC       |
| <i>ACTB</i>  | Forward | GGATGCAGAAGGAGATCACTG        |
|              | Reverse | CGATCCACACGGAGTACTTG         |

# Supplementary Figure S1.

A

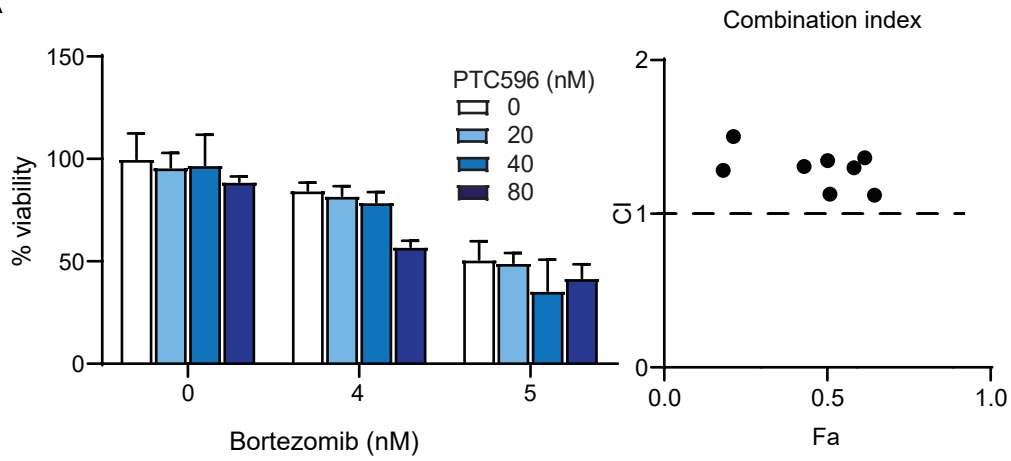

## Supplementary Figure S1. PTC596 and bortezomib do not exert synergistic anti-MM activity without BMSCs.

(A) MTS assay of MM.1S cells treated with the indicated doses of PTC596 for 48 hours and bortezomib for the last 24 hours. The y-axis presents percent viability relative to the untreated control. Data are shown as means  $\pm$  SD of triplicate samples. Combination index values are shown in the right graph.

# Supplementary Figure S2.

A

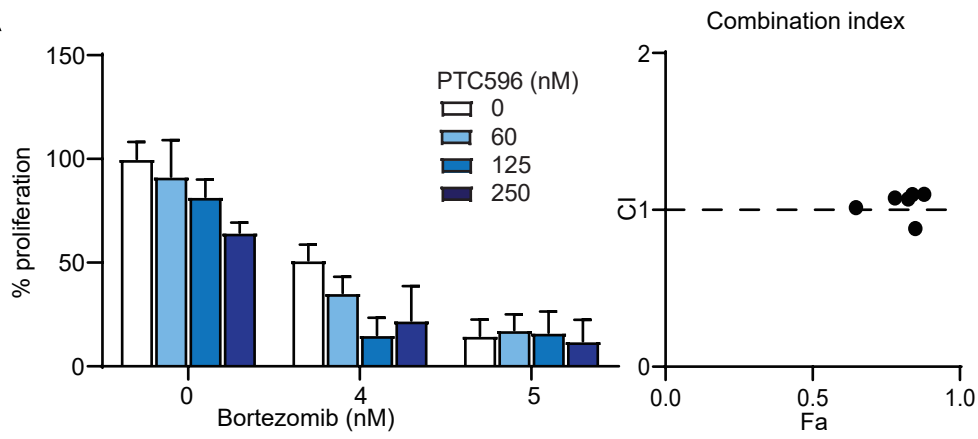

**Supplementary Figure S2. PTC596 and bortezomib exert additive anti-MM activity when the cells are co-cultured with BMSCs**

(A) BrdU proliferation assay of OPM-2 cells co-cultured with BMSCs derived from MM patients upon treatment with the indicated doses of PTC596 and bortezomib for 48 hours. Results of triplicate experiments and combination index values are shown in the left and right graphs, respectively.

# Supplementary Figure S3.

A

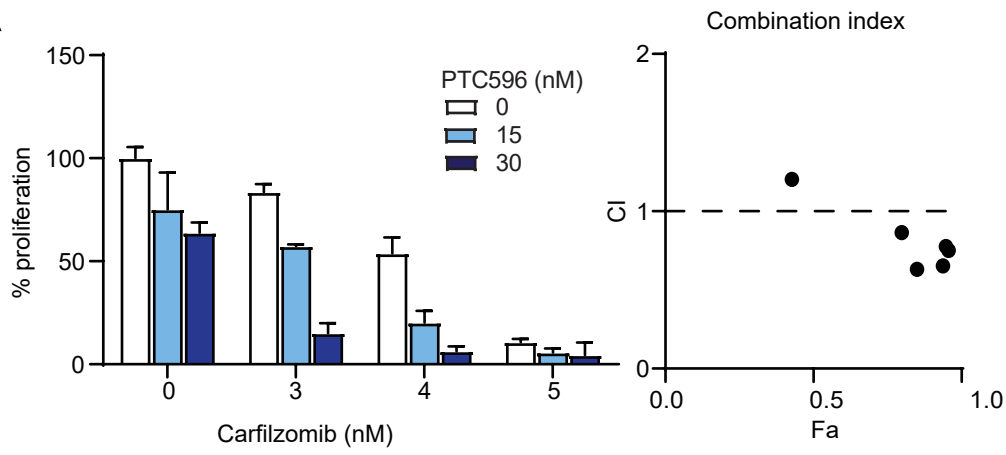

## Supplementary Figure S3. PTC596 and carfilzomib exert synergistic anti-MM activity when the cells are co-cultured with BMSCs

(A) BrdU proliferation assay of MM.1S cells co-cultured with BMSCs derived from MM patients upon treatment with the indicated doses of PTC596 and carfilzomib for 48 hours. Results of triplicate experiments and combination index values are shown in the left and right graphs, respectively.

# Supplementary Figure S4.

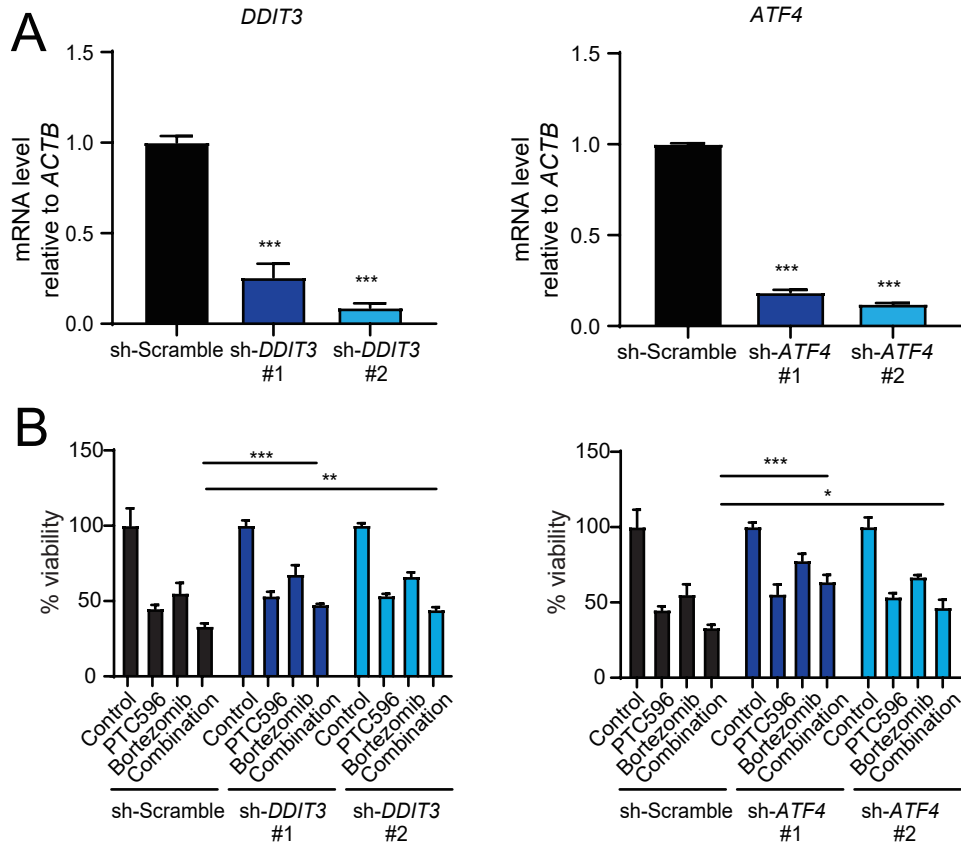

## Supplementary Figure S4. ER stress pathway contributes to the cytotoxicity of the combination treatment.

(A, B) RPMI8226 cells transduced with the indicated lentiviruses were selected by puromycin. Those were subjected to quantitative RT-PCR (A) and MTS assays (B). (A) Quantitative mRNA expression of *DDIT3* and *ATF4*. Y-axis represents fold change after normalization to *ACTB* and error bars represent SD of triplicates. \*\*\* $P < 0.001$  by one-way ANOVA. (B) MTS assays of RPMI8226 cells transduced with sh-*DDIT3* and sh-Scramble lentiviruses (left graphs), and RPMI8226 cells transduced with sh-*ATF4* and sh-Scramble lentiviruses (right graphs), treated with or without PTC596 (15 nM) in the presence or absence of bortezomib (6 nM) for 48 hours. The y-axis presents percent viability relative to the untreated control. Data are shown as means  $\pm$  SD of triplicate samples. \* $P < 0.05$ ; \*\* $P < 0.01$ ; \*\*\* $P < 0.001$  using Student' s *t*-test.

# Supplementary Figure S5.

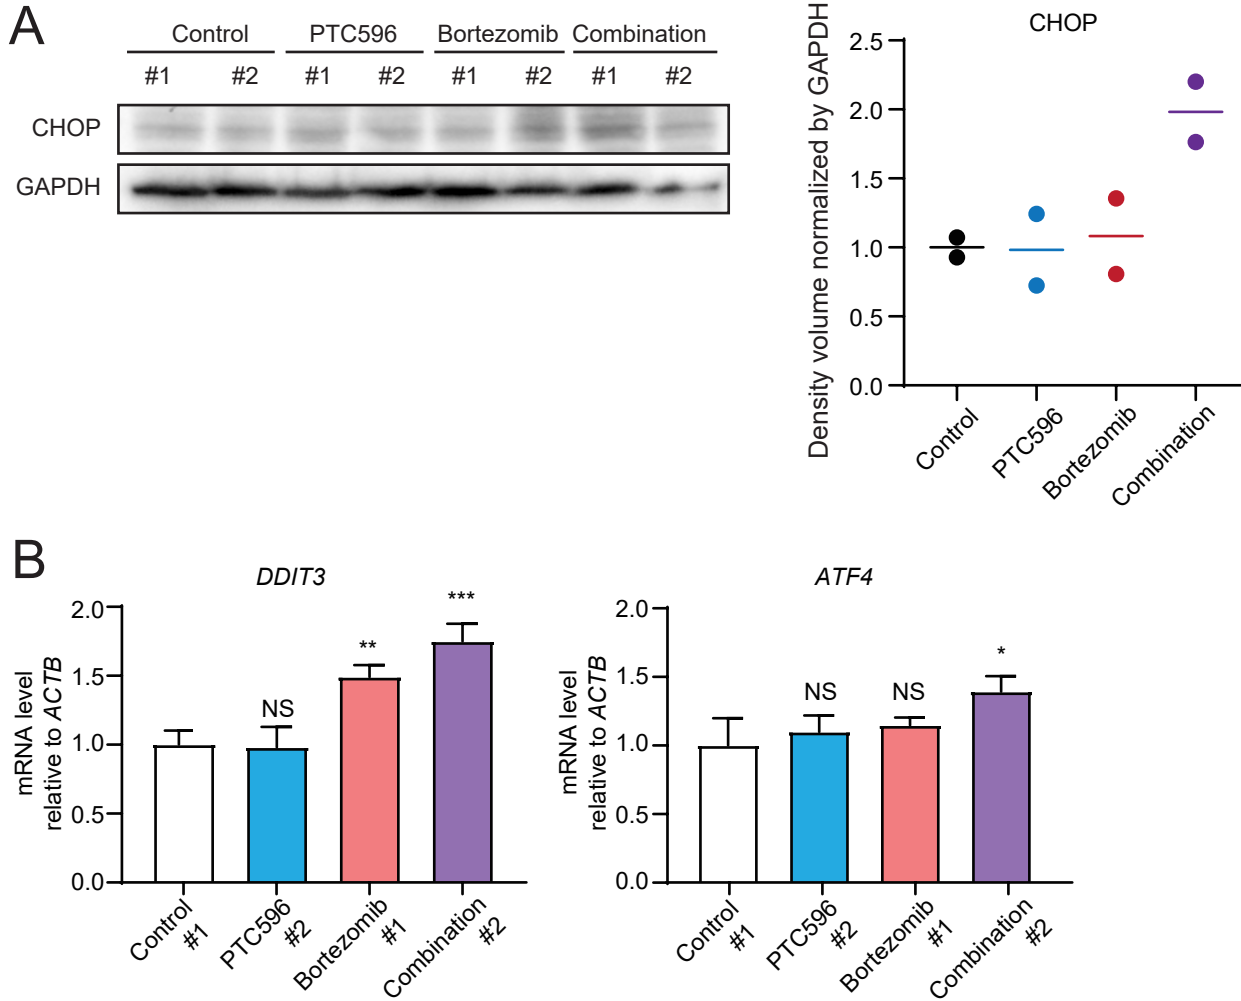

## Supplementary Figure S5. Endoplasmic reticulum stress is augmented by the combination of PTC596 and bortezomib *in vivo*.

(A, B) Tumors harvested from mice treated for 2 weeks with oral PTC596 (6.25 mg/kg) twice a week, subcutaneous bortezomib (0.5 mg/kg) twice a week, or the combination were subjected to western blotting (A) and RT-PCR (B). (A) Western blotting analysis of the indicated proteins in MM tumor cells. GAPDH served as a loading control. The right graphs show the density volume normalized by GAPDH. (B) Quantitative RT-PCR of mRNA expression of *DDIT3* and *ATF4*. *ACTB* was used to normalize the amount of input RNA. Data are shown as mean  $\pm$  SD (n=3). \*P < 0.05; \*\*P < 0.01; \*\*\* P < 0.001; ns, not significant using one-way ANOVA. Y-axis represents fold change after normalization to *ACTB*, and error bars represent SD of triplicates.



# Supplementary Figure S6.

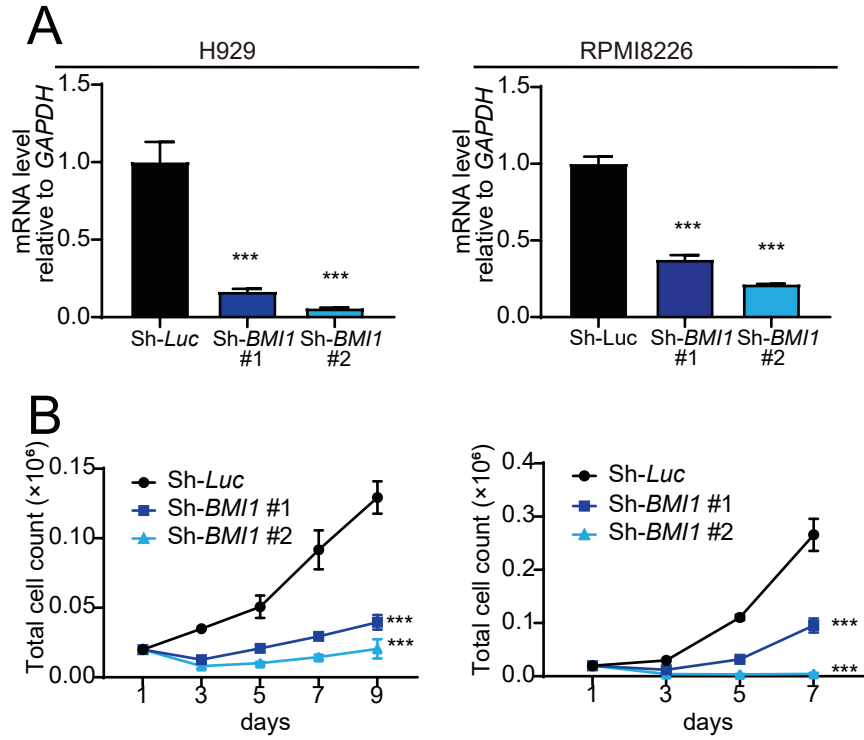

## Supplementary Figure S6. MM cells depend on BMI1 for their growth.

(A, B) Human MM cell lines H929 and RPMI8226 cells transduced with the indicated lentiviruses were selected by cell sorting for GFP expression. Those were subjected to quantitative RT-PCR (A) and cell counting assay (B). (A) Quantitative RT-PCR of mRNA expression of *BMI1*. Y-axis represents fold change after normalization to *GAPDH*, and error bars represent SD of triplicates. \*\*\* $P < 0.001$  by one-way ANOVA. (B) Cell counting assay using trypan blue on the indicated days of cultures. Data represent mean  $\pm$  SD of triplicate cultures. \*\*\* $P < 0.001$  by one-way ANOVA.

# Whole blots for cropped images

Whole blot for cropped image for figure 2A

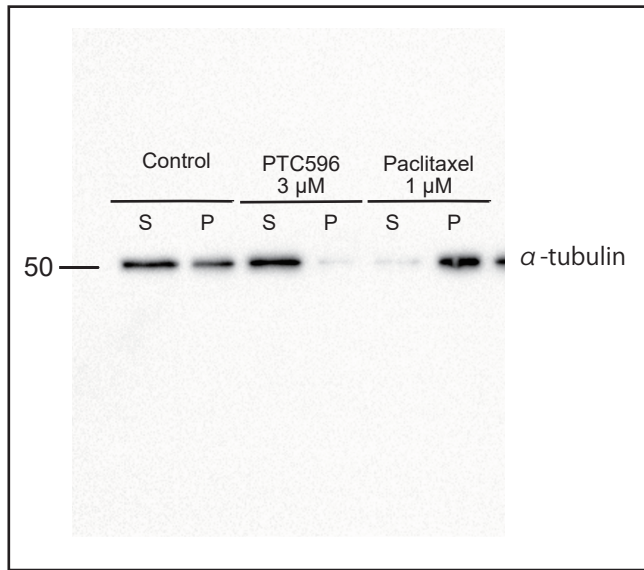

Whole blots for cropped images for figure 3C

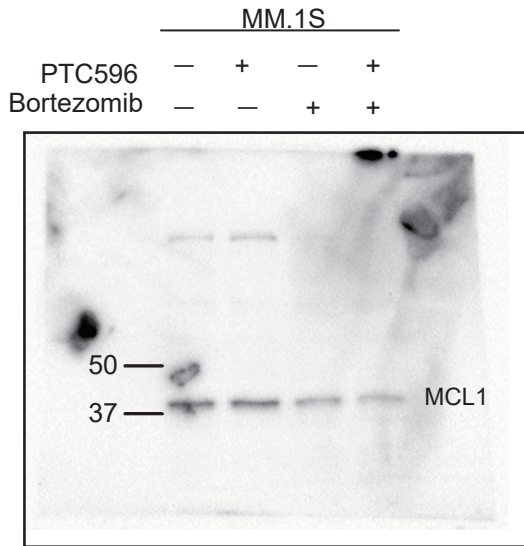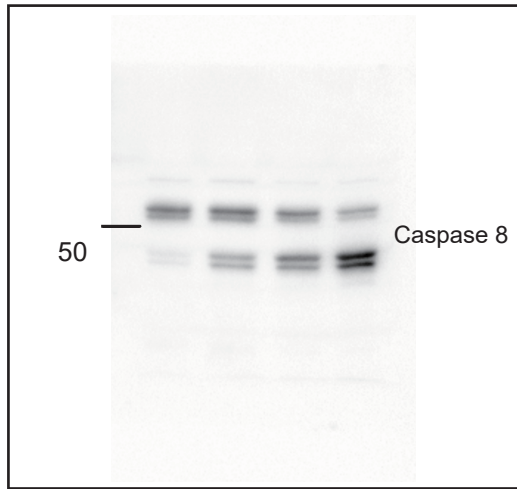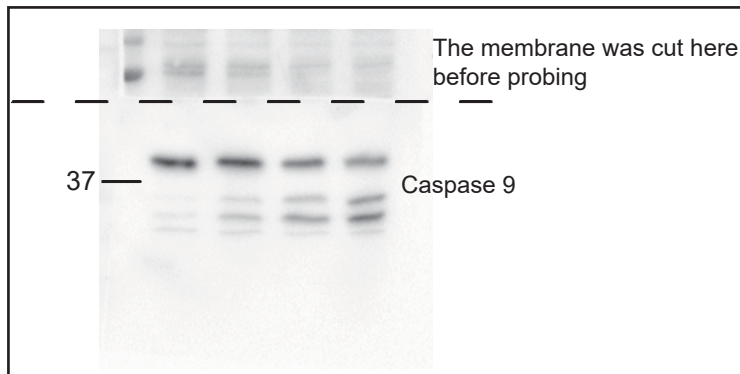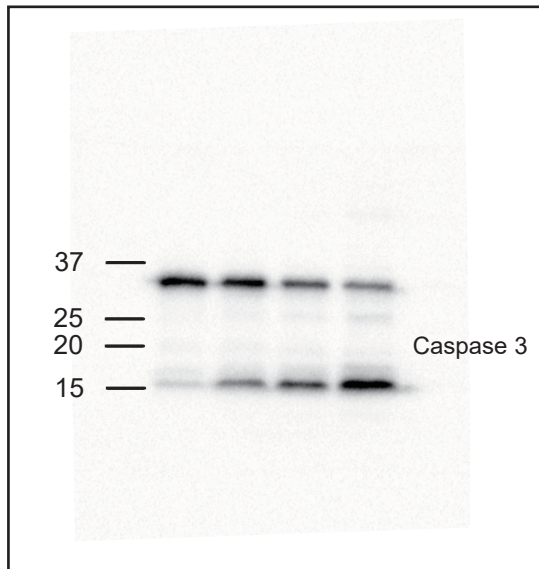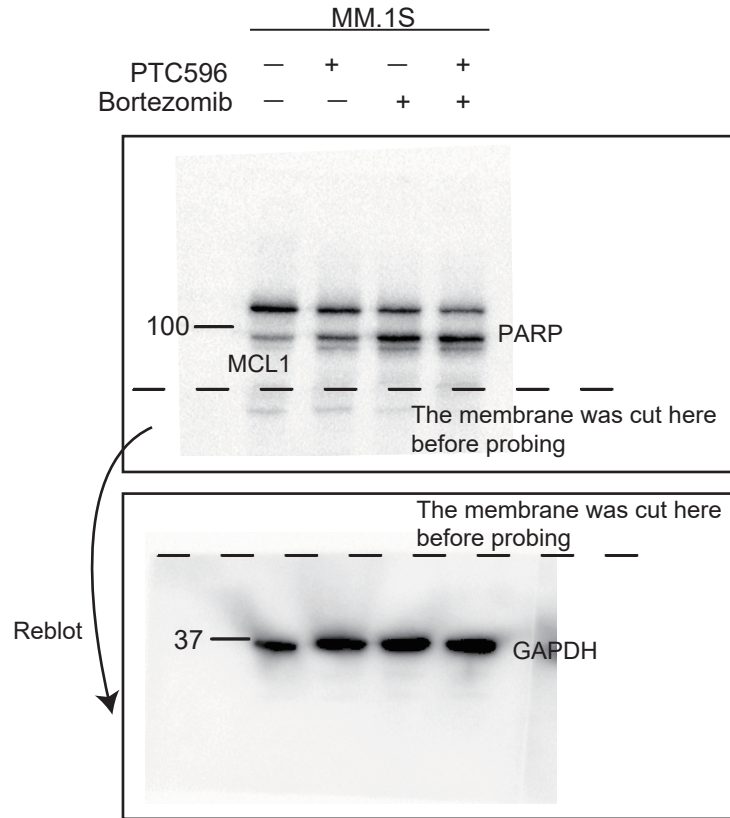

Whole blots for cropped images for figure 3C

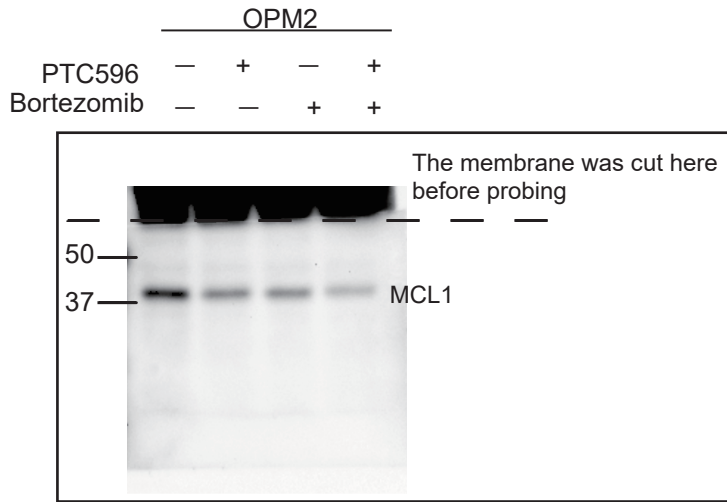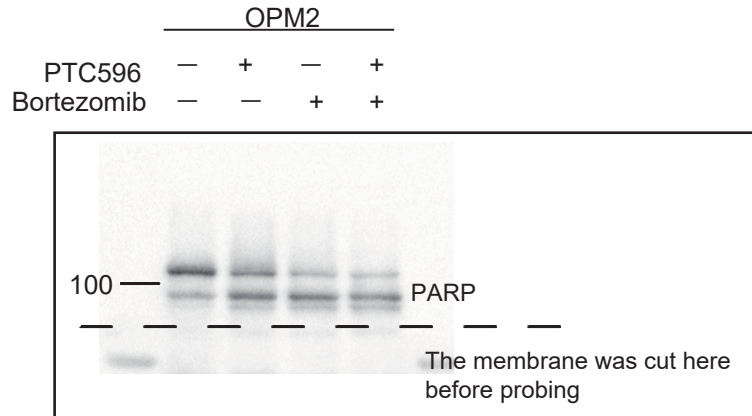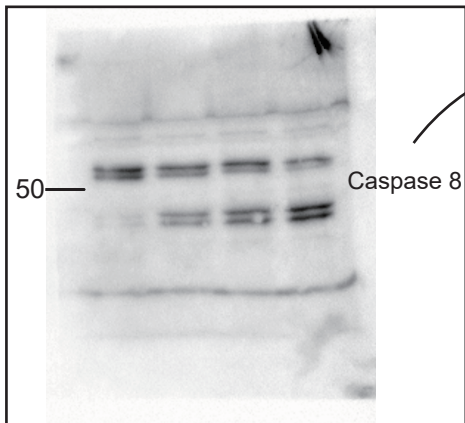

Reblot

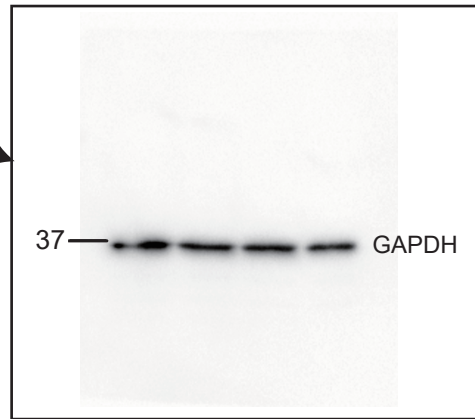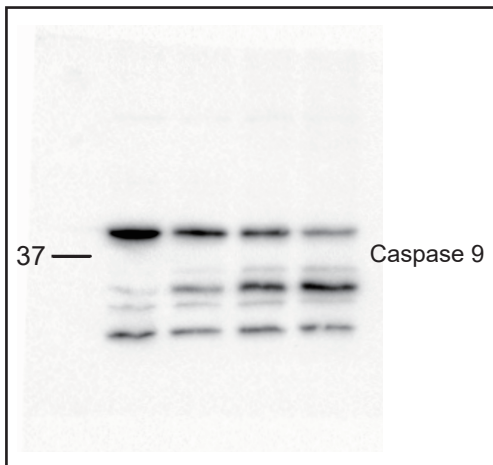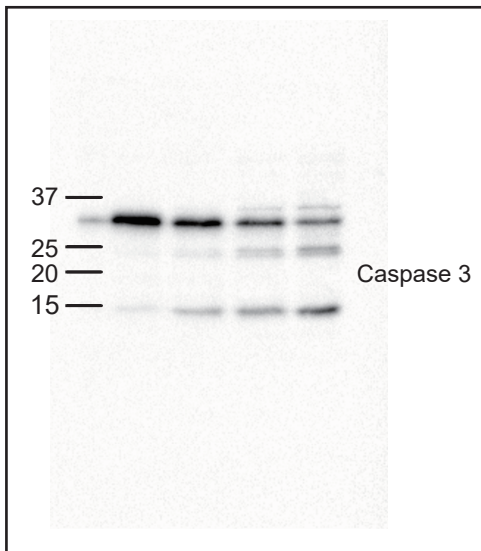

Whole blots for cropped images for figure 5B

MM.1S

Bortezomib (nM) 0 1.5 2.0

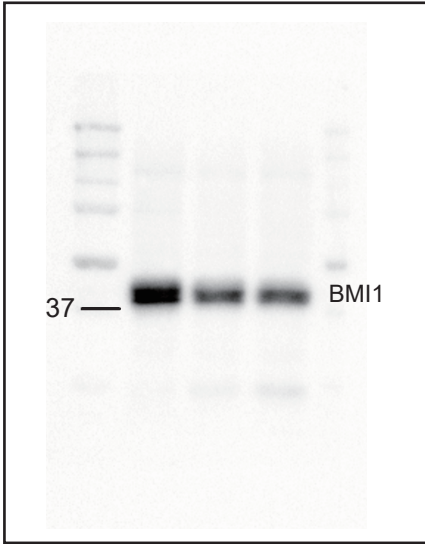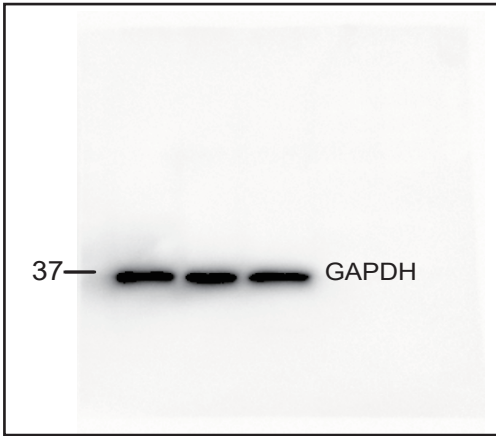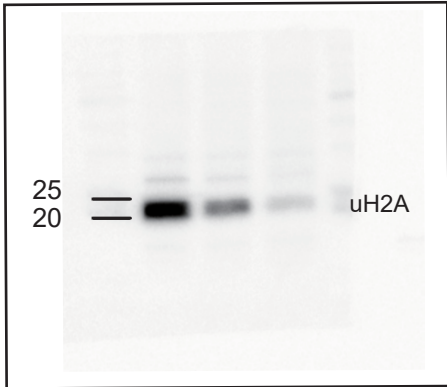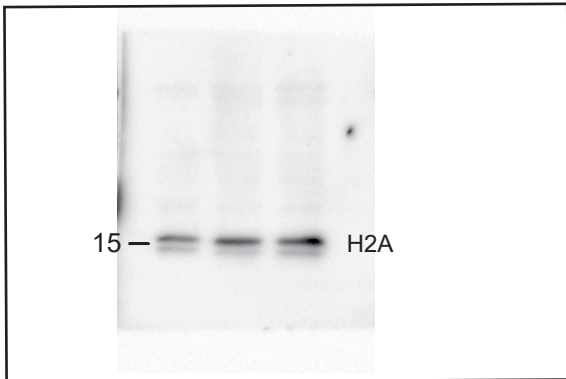

OPM2

Bortezomib (nM) 0 2.5 5.0

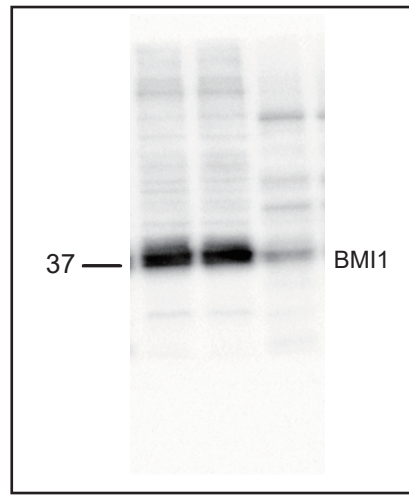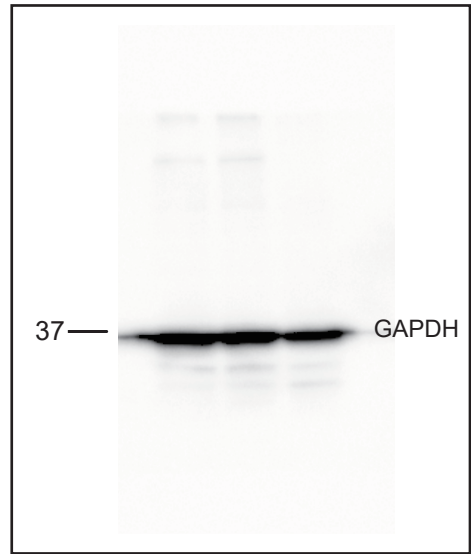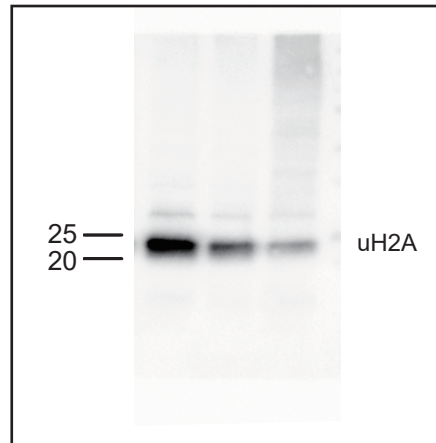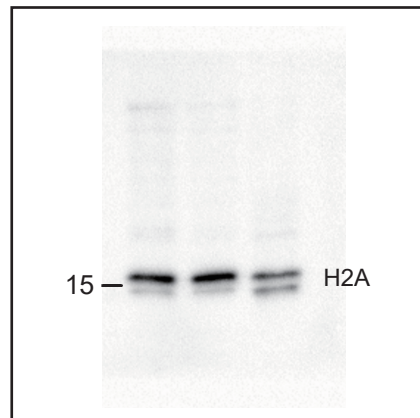



Whole blots for cropped images for figure 5C

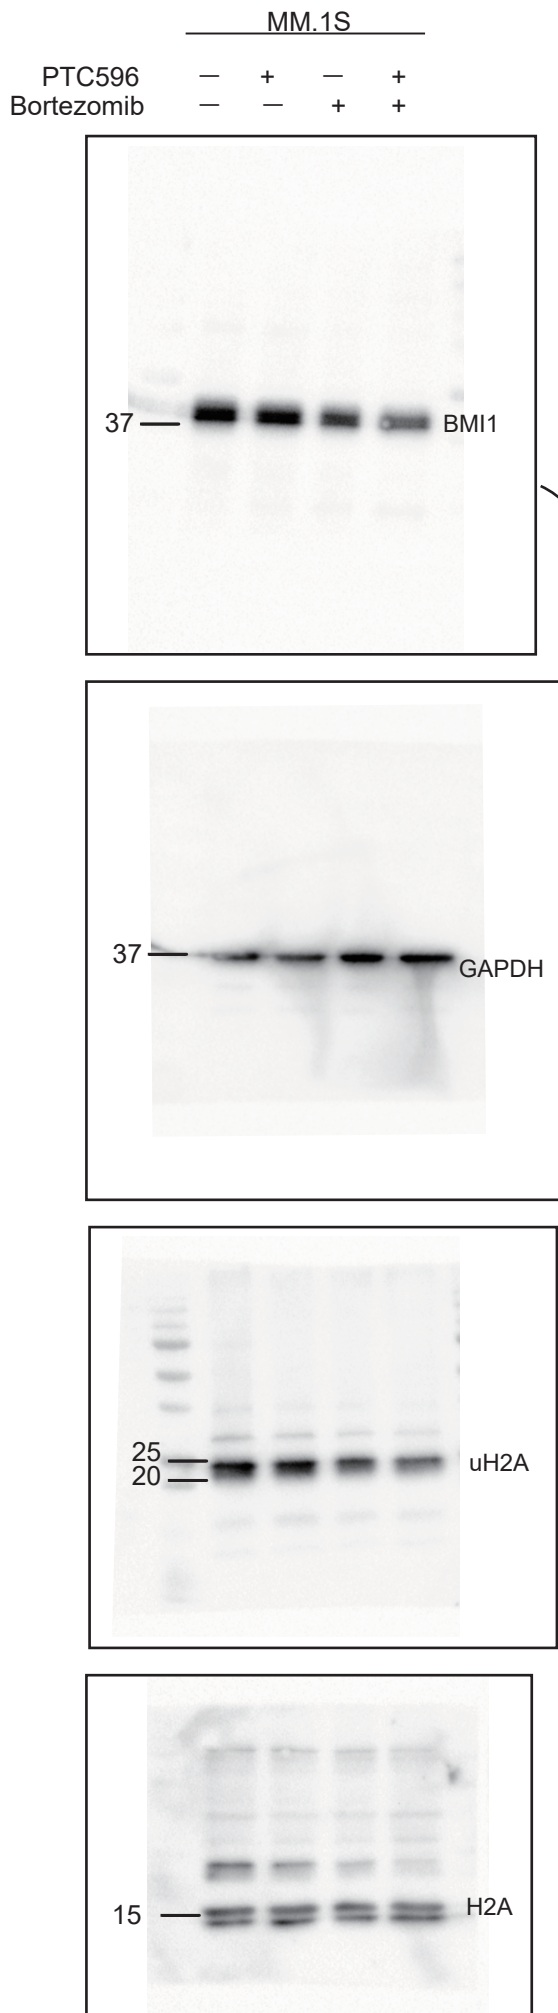

Reblot

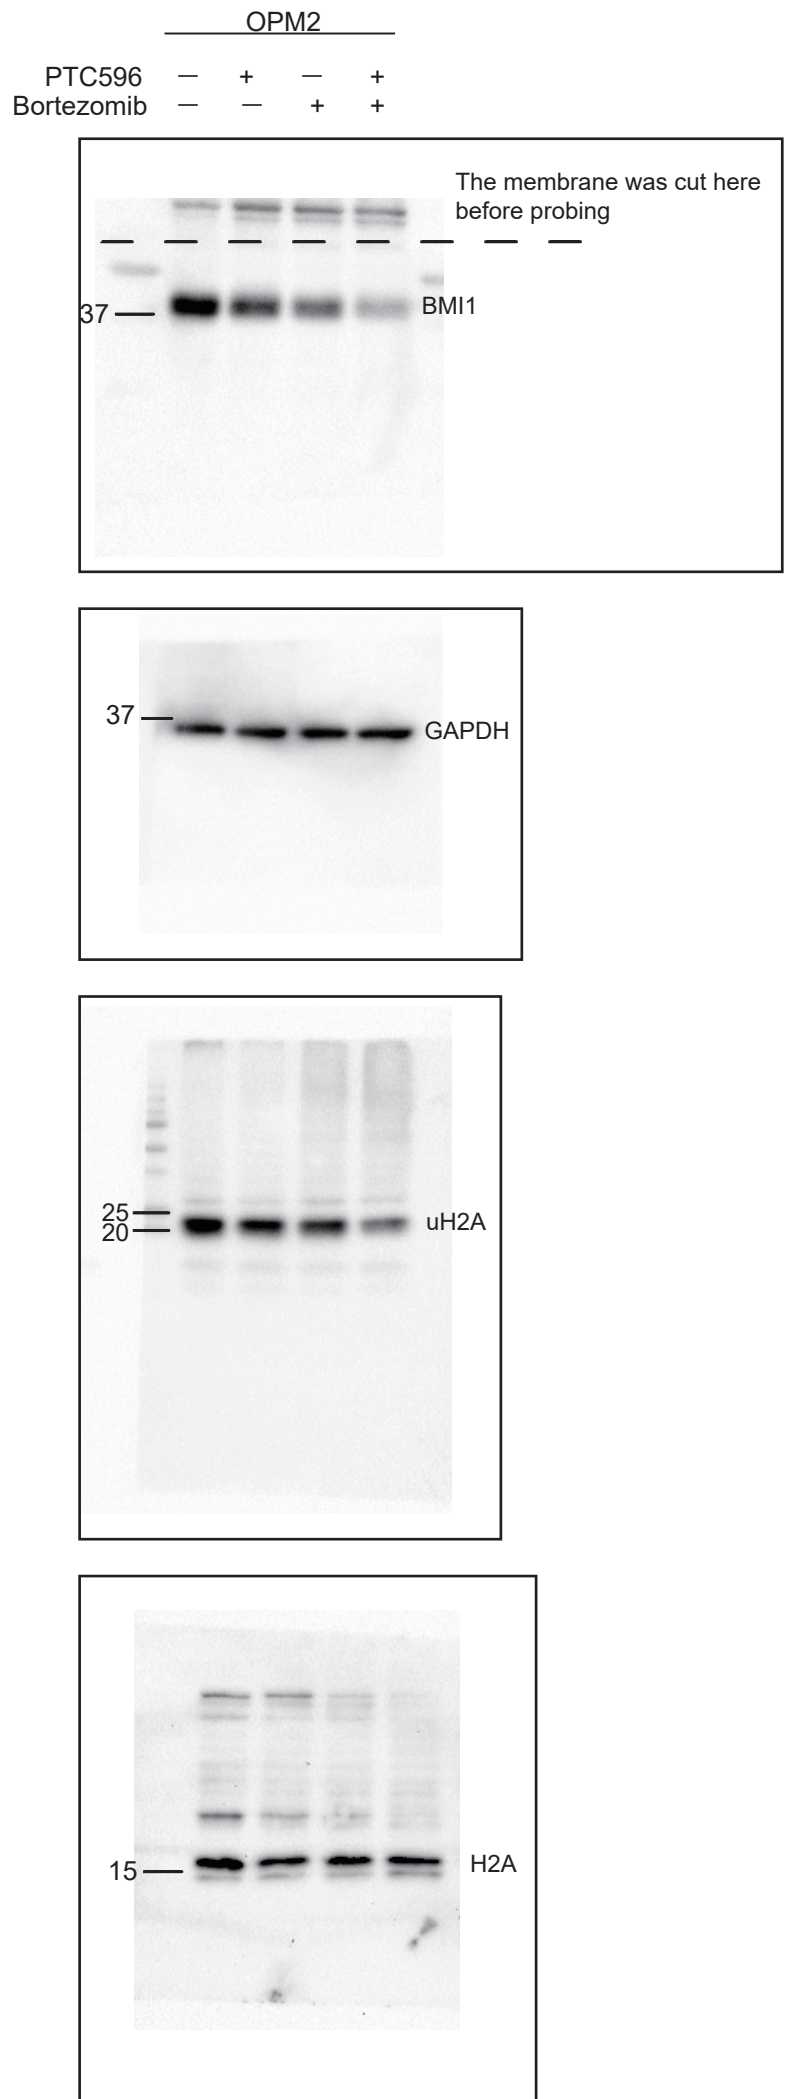

Whole blots for cropped images for figure 6C

|            | MM.1S |   |   |   |
|------------|-------|---|---|---|
| PTC596     | -     | + | - | + |
| Bortezomib | -     | - | + | + |

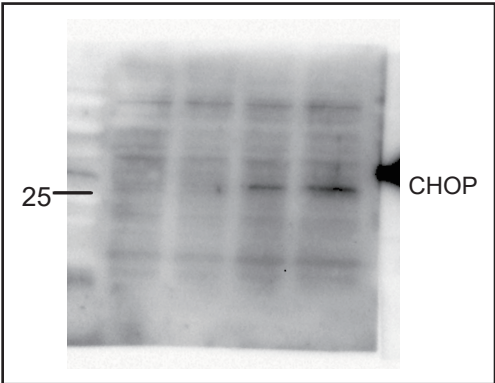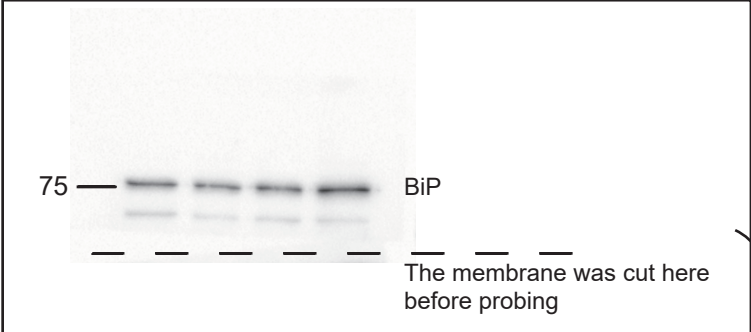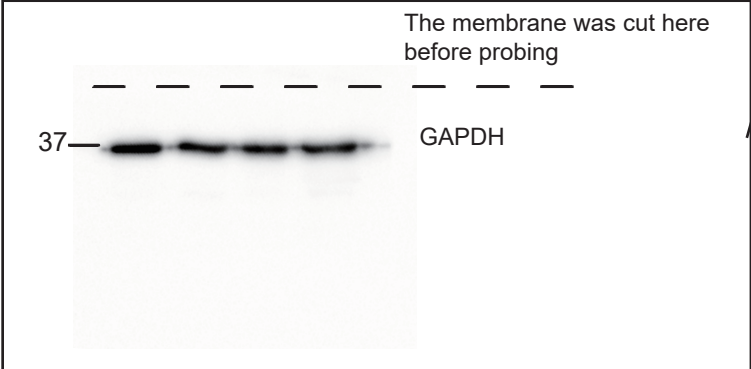

On the same membrane

Whole blots for cropped images for supplementaly figure 5A

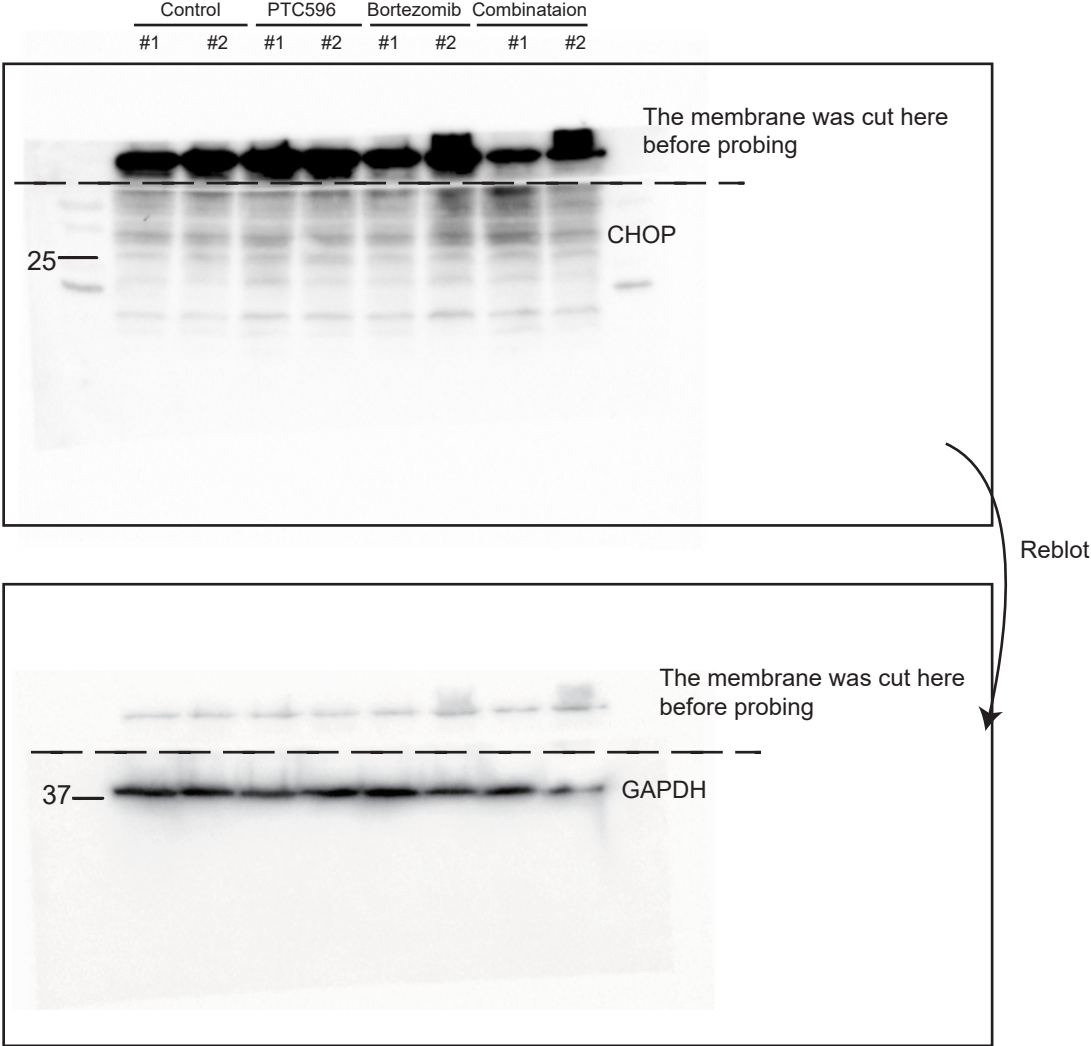

Supplement: 41598_2021_81577_MOESM1_ESM.pdf [file 41598_2021_81577_MOESM1_ESM.pdf]
